## Visfatin upregulates VEGF-C expression and lymphangiogenesis in esophageal cancer by activating MEK1/2-ERK and NF- $\kappa$ B signaling

Chang-Lun Huang<sup>1,2</sup>, David Achudhan<sup>1</sup>, Po-I Liu<sup>3,4</sup>, Yen-You Lin<sup>5</sup>, Shan-Chi Liu<sup>6</sup>, Jeng-Hung Guo<sup>1,7</sup>, Chun-Lin Liu<sup>1,7</sup>, Chih-Ying Wu<sup>7,8,9</sup>, Shih-Wei Wang<sup>10,11</sup>, Chih-Hsin Tang<sup>1,5,12,13,14</sup>

<sup>1</sup>Graduate Institute of Biomedical Science, College of Medicine, China Medical University, Taichung 40402, Taiwan

<sup>2</sup>Department of Surgery, Division of Thoracic Surgery, Changhua Christian Hospital, Changhua 500, Taiwan

<sup>3</sup>Department of General Thoracic Surgery, Asia University Hospital, Taichung 41354, Taiwan

<sup>4</sup>Department of Physical Therapy, Asia University, Taichung 41354, Taiwan

<sup>5</sup>Department of Pharmacology, School of Medicine, China Medical University, Taichung 40402, Taiwan

<sup>6</sup>Department of Medical Education and Research, China Medical University Beigang Hospital, Yunlin 65152, Taiwan

<sup>7</sup>Department of Neurosurgery, China Medical University Hospital, Taichung 404327, Taiwan

<sup>8</sup>Graduate Institute of Integrated Medicine, China Medical University, Taichung 406040, Taiwan

<sup>9</sup>Department of Neurosurgery, China Medical University Hsinchu Hospital, Hsinchu 302, Taiwan

<sup>10</sup>Department of Medicine, Mackay Medical College, New Taipei 252, Taiwan

<sup>11</sup>College of Pharmacy, Graduate Institute of Natural Products, Kaohsiung Medical University, Kaohsiung 807, Taiwan

<sup>12</sup>Chinese Medicine Research Center, China Medical University, Taichung 406040, Taiwan

<sup>13</sup>Department of Medical Laboratory Science and Biotechnology, College of Health Science, Asia University, Taichung 41354, Taiwan

<sup>14</sup>Department of Medical Research, China Medical University Hsinchu Hospital, Hsinchu 302, Taiwan

**Correspondence to:** Chih-Hsin Tang; **email:** [chtang@mail.cmu.edu.tw](mailto:chtang@mail.cmu.edu.tw)

**Keywords:** esophageal cancer, visfatin, VEGF-C, lymphangiogenesis

**Received:** March 23, 2023

**Accepted:** May 17, 2023

**Published:** June 7, 2023

**Copyright:** © 2023 Huang et al. This is an open access article distributed under the terms of the [Creative Commons Attribution License](https://creativecommons.org/licenses/by/3.0/) (CC BY 3.0), which permits unrestricted use, distribution, and reproduction in any medium, provided the original author and source are credited.

### ABSTRACT

Lymph node metastasis is a recognized prognostic factor in esophageal cancer. Adipokines, including visfatin, and the molecule vascular endothelial growth factor (VEGF)-C, are implicated in lymphangiogenesis, but whether any association exists between esophageal cancer, adipokines and VEGF-C is unknown. We examined the relevance of adipokines and VEGF-C in esophageal squamous cell carcinoma (ESCC) in the Gene Expression Omnibus (GEO) and The Cancer Genome Atlas (TCGA) databases. We found significantly higher levels of visfatin and VEGF-C expression in esophageal cancer tissue than in normal tissue. Immunohistochemistry (IHC) staining identified that higher levels of visfatin and VEGF-C expression were correlated with advanced stage ESCC. Visfatin treatment of ESCC cell lines upregulated VEGF-C expression and VEGF-C-dependent lymphangiogenesis in lymphatic endothelial cells. Visfatin induced increases in VEGF-C expression by activating the mitogen-activated protein kinase kinases1/2-extracellular signal-regulated kinase (MEK1/2-ERK) and Nuclear Factor Kappa B (NF- $\kappa$ B) signaling cascades. Transfecting ESCC cells with MEK1/2-ERK and NF- $\kappa$ B inhibitors (PD98059, FR180204, PDTC, and TPCK) and siRNAs inhibited visfatin-induced increases in VEGF-C expression. It appears that visfatin and VEGF-C are promising therapeutic targets in the inhibition of lymphangiogenesis in esophageal cancer.

## INTRODUCTION

Esophageal cancer is a highly lethal malignancy that accounted for approximately 5.5% of all cancer deaths worldwide in 2020 [1]. Asian countries have higher incidence and mortality rates of esophageal cancer than other global regions [2]. Taiwan's 2019 Cancer Registry Annual Report listed esophageal cancer as the ninth most common cause of cancer death nationwide; the leading histologic subtype was squamous cell carcinoma (SCC), accounting for 91.4% of all subtypes [3]. Lymphovascular invasion within the tumor and lymph node metastasis are indicators of poor prognosis [4, 5]. Even in superficial esophageal carcinoma, patients with lymphovascular invasion within the tumor have higher rates of lymph node metastasis (hazard ratio (HR) 5.72) and lower overall survival (HR 1.85) compared with patients without lymphovascular invasion [6]. Spreading of the tumor to adjacent tissues, regional lymph nodes or distant organs are all independent prognostic factors of survival and are included in the cancer staging categories for esophageal cancer of the 8th edition of the American Joint Committee on Cancer (AJCC) [7]. The lymphatic system actively participates in metastatic tumor invasion [8].

Obesity is a major health problem in Taiwan, which experienced steep increases in the rates of obesity and morbid obesity between 2013 and 2016 [9, 10]. Much evidence links obesity with an increase in risk of cancer metastasis, particularly renal, prostate, endometrial, breast, colorectal and esophageal cancers [11, 12]. Adipokines, bioactive substances secreted by adipocytes (fat cells), play important roles in inflammation, metabolic disease, cardiovascular disease, cancer progression and metastasis [13–15]. Adipokines may even induce the epithelial-to-mesenchymal transition (EMT) process in the tumor microenvironment [16]. The relationship between adipokines and lymphangiogenesis has been described in recent studies [17–19]. For example, the adipokine visfatin regulates tumor proliferation, angiogenesis, metastasis and drug resistance in several different types of cancers [20].

Visfatin is regarded as an extracellular nicotinamide phosphoribosyltransferase (eNAMPT) enzyme and a multifunctional adipokine that was first identified in visceral adipose tissue [21]. Upregulated serum levels of visfatin are found in patients with various types of cancers [22, 23]. Visfatin plays a pivotal role in cancer progression and drug resistance [20]. For instance, visfatin appears to lower doxorubicin sensitivity in small cell lung cancer (SCLC) A549 and H1793 cell lines by activating the Akt/ABCC1 signaling pathways [24]. Moreover, levels of visfatin protein and mRNA expression are significantly increased in doxorubicin-

resistant non-small cell lung cancer (NSCLC) cell lines [24]. Higher levels of visfatin expression correlate with poorer prognoses in breast, gastric, urothelial, and head and neck SCC [20, 25, 26]. This study examined the role of visfatin in ESCC.

Several molecules have been implicated in lymphangiogenesis [27], including vascular endothelial growth factor (VEGF)-C [28]. High levels of VEGF-C expression correlate with advanced stage disease, deeply invasive tumors and lymph node metastasis [29]. Higher levels of VEGF-C expression are linked to lower 5-year survival rates in esophageal squamous cell carcinoma (ESCC) [30, 31]. Lymphangiogenic mediators are regulated by various signal transduction pathways in cancer, such as the MEK1/2-ERK and NF- $\kappa$ B pathways [32, 33]. In specific, the MEK1/2-ERK and NF- $\kappa$ B signaling cascades is crucial for, cell survival and resistance of chemotherapy and promoting tumor-induced angiogenesis [34]. Thus, examining the MEK1/2-ERK and NF- $\kappa$ B pathways is expected to improve our understanding as to how to reduce lymphangiogenesis cytokine expression in ESCC. This study investigated cellular and molecular mechanisms of visfatin and VEGF-C in ESCC cells. Our findings reveal that visfatin upregulates VEGF-C expression in ESCC cells via the MEK1/2-ERK and NF- $\kappa$ B signaling cascades.

## RESULTS

### Higher levels of visfatin expression in ESCC versus normal tissue

Visfatin stimulates the progression of cancers, including breast cancer [35], oral squamous cell carcinoma [36] and gastric cancer [37], but its role in ESCC is unknown. We therefore screened gene expression profiling records from the Gene Expression Omnibus (GEO) database for several adipocytokines, including adiponectin, resistin, nesfatin, omentin and leptin (Figure 1A). Significantly higher levels of visfatin expression were found in ESCC tissues than in normal tissue samples (Figure 1A, 1B). The results were similar in clinical samples downloaded from The Cancer Genome Atlas (TCGA) database (Figure 1C). The 4-year Kaplan-Meier overall survival rates were significantly shorter for the high visfatin expression group compared with the low visfatin expression group (Figure 1D). Tissue array data revealed higher levels of visfatin expression in more advanced ESCC samples than in lower-grade disease samples (Figure 1E). The quantification of these results showed significantly higher levels of visfatin expression in the higher-stage tumors (IIB and IVA) than in the lower-stage tumors (IB and IIA) and normal tissue samples (Figure 1F), indicating a positive association between levels of visfatin expression and ESCC cancer progression. Further

experiments identified higher levels of positive peritumoral lymphatic vessel density (LVD) in N1 and N2 stage disease than in N0 tissue samples (Figure 1G and Supplementary Figure 1), indicating that visfatin is associated with lymphatic metastasis in ESCC progression.

### Higher levels of VEGF-C expression in ESCC tissue versus normal tissue

Levels of lymphangiogenic factors, including VEGF-C, are higher in cancers that have metastasized [29]. As VEGF-C is known to regulate lymphangiogenesis in

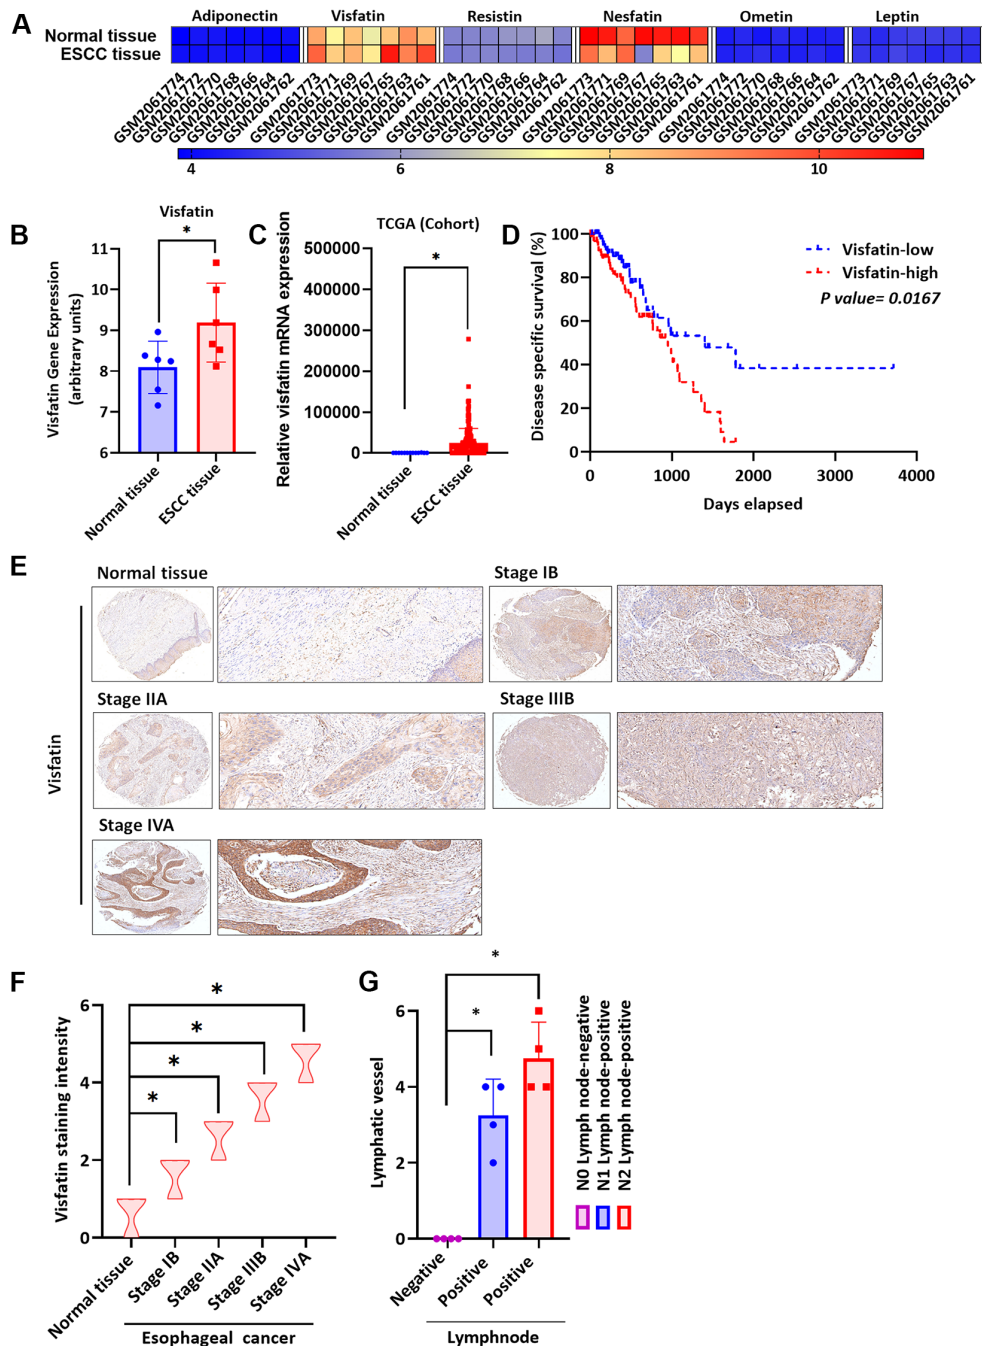

**Figure 1. Clinicopathologic features of visfatin expression in human ESCC tissue samples.** (A) The gene expression profiles of visfatin in ESCC tissue and normal tissue samples were analyzed in specimens from the GEO and TCGA databases. (B, C) Levels of visfatin were significantly increased in ESCC samples compared with normal tissue samples. (D) Kaplan-Meier analysis of overall survival according to visfatin expression in patients with esophageal cancer. (E, F) The human ESCC tissue array specimens were subjected to IHC evaluations with visfatin antibody, and levels of positive staining were quantified by IHC scoring ( $N = 4$  per group). Scale bar: 100  $\mu$ m. (G) Positive peritumoral lymphatic vessel density in patients with N0, N1, or N2 ESCC tissue array samples ( $N = 4$  per group). \* $P < 0.05$  compared with normal tissue samples or N0 lymph node negative tissue array samples.

various types of cancer cells [38, 39], we therefore screened gene expression profiling records from the GEO database for several lymphangiogenic genes, including vascular endothelial growth factor-C (*VEGF-C*), *VEGF-B*, ephrin type-B receptor-3 (*EPHB3*), angiomin-like

protein-2 (*AMOTL2*), angiomin (*AMOT*) and prospero homeobox-1 (*PROX1*) (Figure 2A). Significantly higher levels of VEGF-C expression were found in ESCC tissues than normal tissue samples (Figure 2A, 2B). Similarly, TCGA database screening identified higher

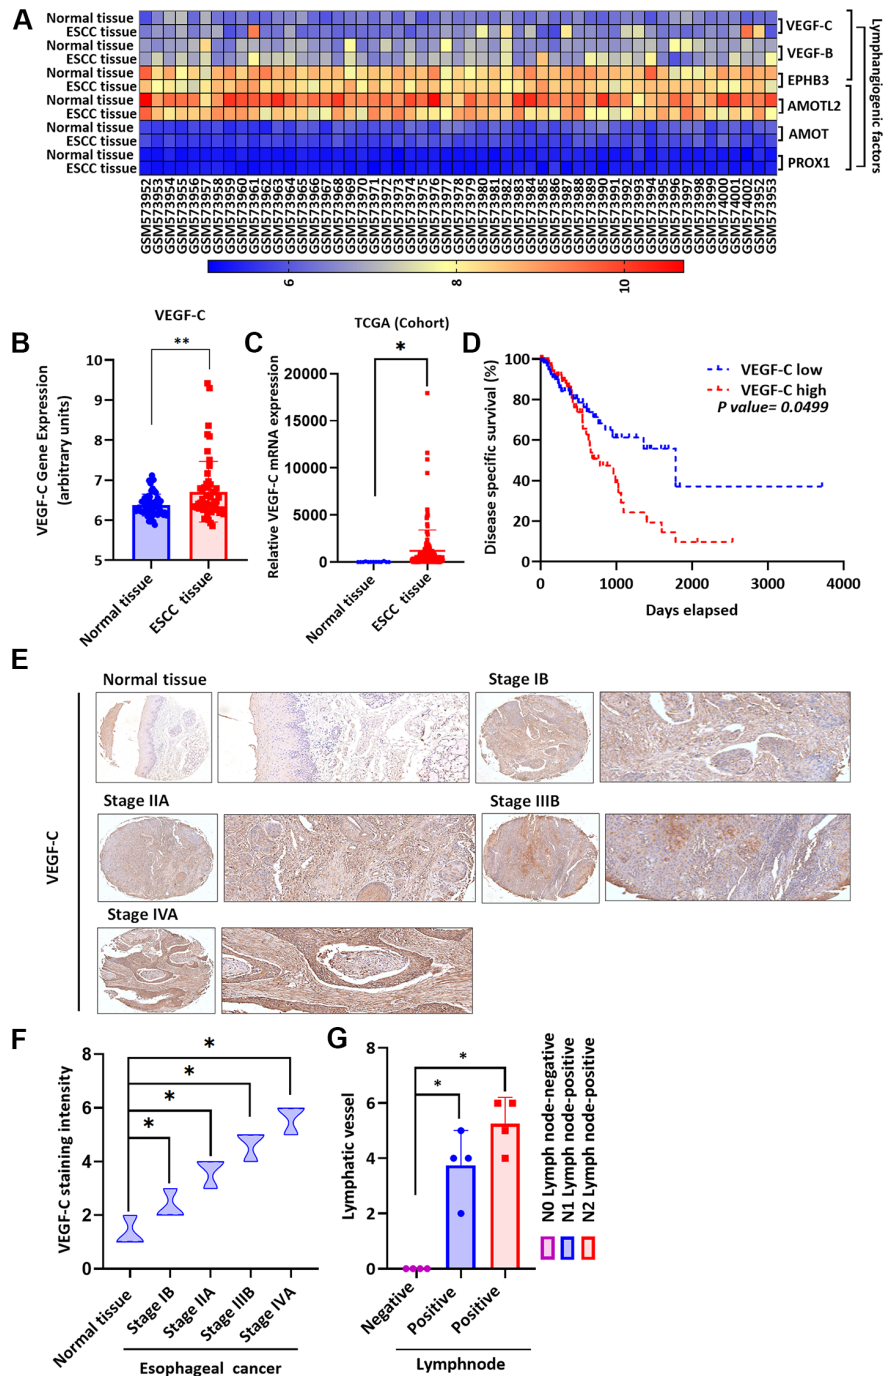

**Figure 2. Clinicopathologic features of VEGF-C expression in human ESCC tissue.** (A) The gene expression profiles of VEGF-C in ESCC tissue and normal tissue samples were analyzed in GEO and TCGA database records. (B, C) Levels of VEGF-C expression were significantly higher in ESCC samples compared with the normal tissue samples. (D) Kaplan-Meier analysis of overall survival according to VEGF-C expression in patients with esophageal cancer. (E, F) The human ESCC tissue array specimens were subjected to IHC evaluations with VEGF-C antibody, and the positive staining was quantified by IHC scoring ( $N = 4$  per group). Scale bar: 100  $\mu\text{m}$ . (G) Positive peritumoral lymphatic vessel density in patients with N0, N1, or N2 ESCC tissue array samples ( $N = 4$  per group). \* $P < 0.05$  compared with normal tissue samples or N0 lymph node negative tissue array samples.



levels of VEGF-C expression in ESCC tissues than in normal tissue samples (Figure 2C). Four-year Kaplan-Meier overall survival was shorter in the high VEGF-C expression group compared with the low VEGF-C expression group (Figure 2D). Tissue array results revealed higher levels of VEGF-C expression in patients with higher-grade ESCC than in those with lower-grade disease (Figure 2E); Figure 2F shows significantly higher levels of VEGF-C expression in the higher-stage tumors (IIB and IVA) than in the lower-stage tumors (IB and IIA) and normal tissue samples. Further experiments identified higher levels of positive peritumoral LVD in N1 and N2 stage disease compared with N0 tissue samples (Figure 2G and Supplementary Figure 1), indicating that VEGF-C is associated with lymphatic metastasis in ESCC progression. A positive correlation was observed between levels of visfatin and VEGF-C staining intensity in human ESCC tissue samples ( $R = 0.9564$ , Supplementary Figure 2).

### Visfatin induces increases in VEGF-C expression in ESCC

We first investigated the effects of different visfatin concentrations (1, 3, 10, or 30 ng/mL) upon the viability of the ESCC cell lines CE81T and KYSE-410 (Supplementary Figure 3); only the highest concentration (30 ng/mL) was used in pathway screening analyses and the lymphatic endothelial cell (LEC) tube formation assay. Incubation of the cells with visfatin (1, 3, 10, or 30 ng/mL) significantly increased levels of VEGF-C mRNA and protein expression in ESCC cells (Figure 3A–3D).

### Visfatin induces VEGF-C-dependent lymphangiogenesis

We then examined whether visfatin plays a role in VEGF-C-regulated lymphangiogenesis. Conditioned medium (CM) from ESCC cells promoted tube formation

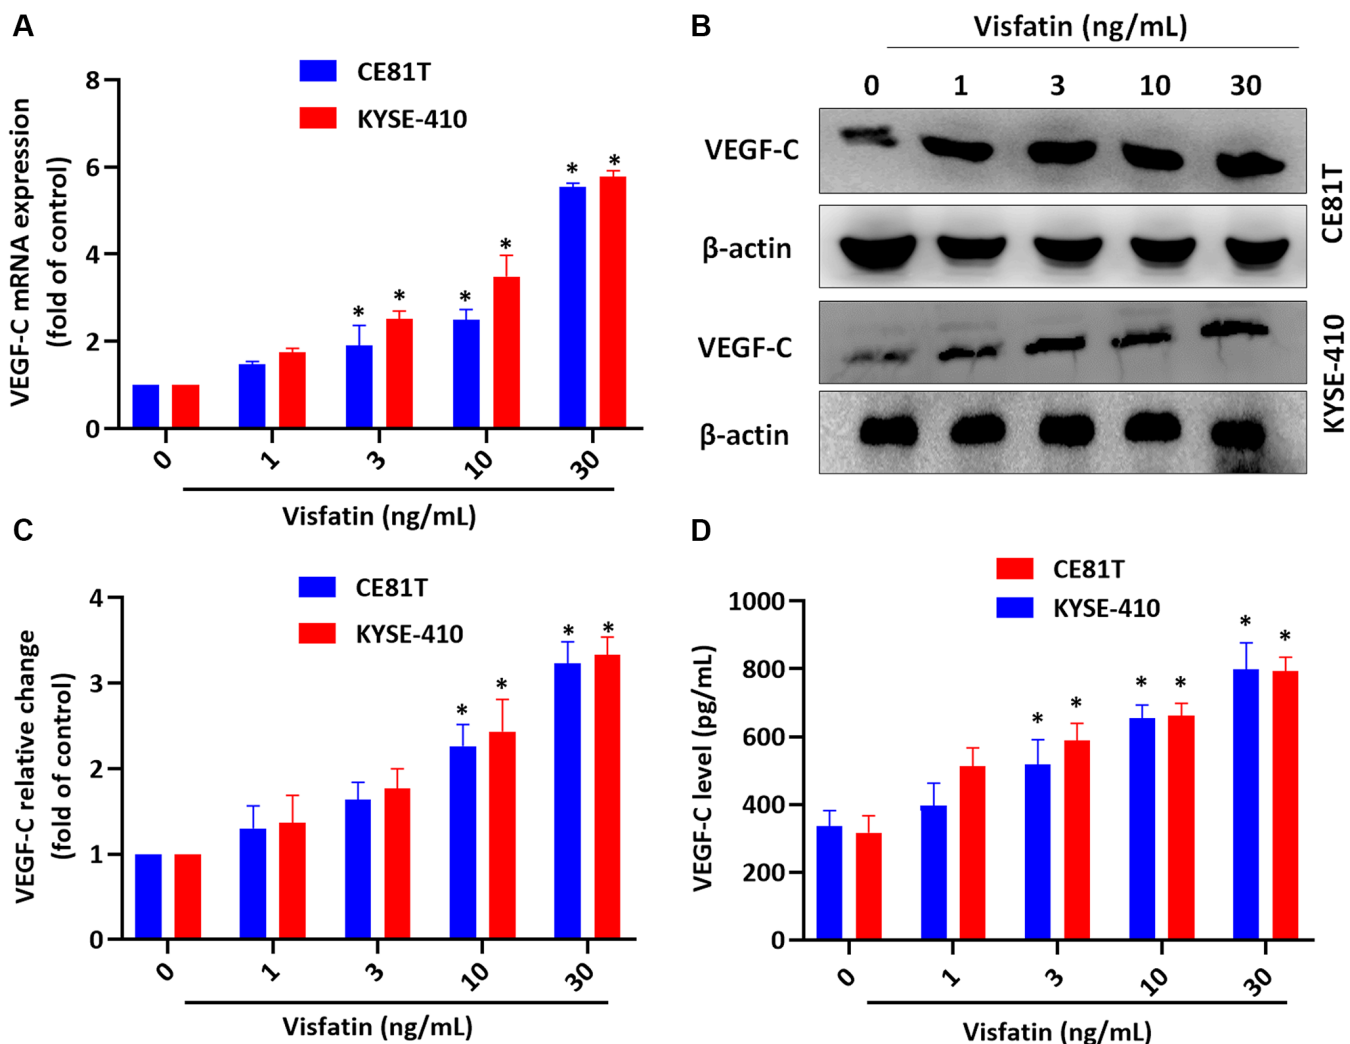

**Figure 3. Visfatin promotes increases in VEGF-C expression in ESCC cells.** (A–D) ESCC cells were stimulated with visfatin for 24 h, before determining levels of VEGF-C mRNA and protein expression by qPCR (A), Western blot (B, C), and ELISA (D). \* $P < 0.05$  compared with the control group.

activity in LECs (Figure 4A). VEGF-C monoclonal antibody (mAb), but not the immunoglobulin (Ig)G control, abolished visfatin-mediated effects (Figure 4A, 4B).

### Visfatin promotes higher levels of VEGF-C expression by activating MEK1/2 signaling

MEK signaling is implicated in lymphangiogenesis and metastasis [40, 41]. We therefore incubated the ESCC cell lines with visfatin (30 ng/mL), to examine whether MEK signaling is involved in ESCC lymphangiogenesis. After 15 min of incubation, MEK1/2 phosphorylation

levels were increased (Figure 5A, 5B). Pretreating cells with a MEK inhibitor or small interfering RNA (siRNA) blocked visfatin-mediated increases in VEGF-C mRNA and protein expression (Figure 5C–5E). Similar results were observed when ESCCs were transfected with MEK siRNA (Figure 5F).

### Visfatin increases levels of VEGF-C-expression by activating ERK signaling

We then incubated the ESCC cell lines with visfatin (30 ng/mL), to examine whether ERK signaling is

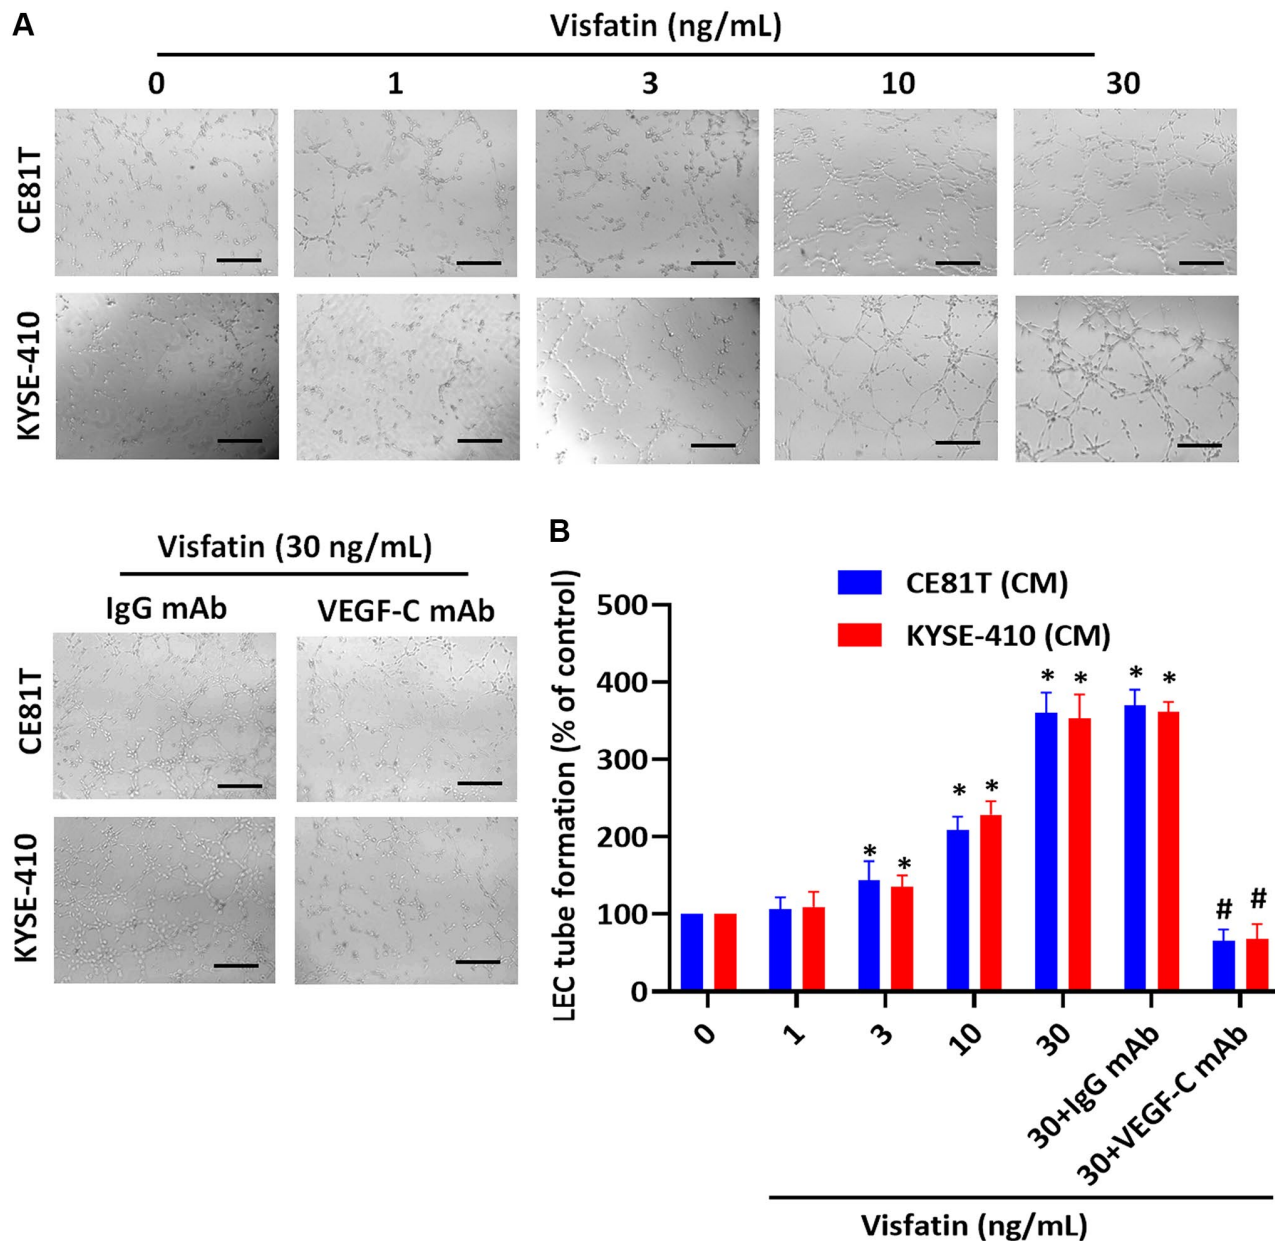

**Figure 4. Visfatin stimulates VEGF-C-dependent lymphangiogenesis in ESCC cells.** (A, B) ESCC cells were stimulated with visfatin for 24 h, or preincubated with IgG control antibody or VEGF-C antibody (1  $\mu$ g/mL) for 30 min, then incubated with visfatin (30 ng/mL) for 24 h. CM was collected from each experiment and added to LECs, to examine tube formation activity. \* $P < 0.05$  compared with the control group; # $P < 0.05$  compared with the visfatin-treated group.

involved in ESCC lymphangiogenesis. ERK phosphorylation levels were significantly increased from baseline in both cell lines after 15 and 30 min (Figure 6A, 6B). Pretreating cells with the ERK inhibitor or siRNA blocked visfatin-mediated increases in VEGF-C mRNA and protein expression (Figure 6C–6E). Similar results were observed when ESCCs were transfected with ERK siRNA (Figure 6F).

### Visfatin induces VEGF-C expression by activating NF- $\kappa$ B signaling

NF- $\kappa$ B is a well-known transcription factor in cancer progression and metastasis [42] and NF- $\kappa$ B activation regulates ESCC angiogenesis [43]. We therefore incubated the ESCC cell lines with visfatin (30 ng/mL), to examine whether NF- $\kappa$ B signaling is involved in ESCC lymphangiogenesis. The p65 phosphorylation levels were significantly increased from baseline in both cell lines after 60 min (Figure 7A, 7B). Pretreating cells with NF- $\kappa$ B inhibitors or siRNAs blocked visfatin-

mediated increases in VEGF-C mRNA and protein expression (Figure 7C–7E). Similar results were observed when ESCCs were transfected with p65 siRNA (Figure 7F). In addition, stimulation of ESCCs with visfatin enhanced NF- $\kappa$ B luciferase activity, which was reversed by MEK and ERK inhibitors (Figure 7G). Thus, visfatin appears to upregulate VEGF-C by activating the MEK, ERK and NF- $\kappa$ B signaling cascades.

### DISCUSSION

Esophageal cancer is a relatively common cancer worldwide and is well recognized for its metastatic potential and poor prognosis [44]. Around 90% of esophageal cancers in Asia are the ESCC subtype, which has a particularly poor prognosis and high mortality rate [2, 45]. The 5-year survival rate for people with esophageal cancer is quite low (~25%), despite significant advancements in diagnosis and therapy [46]. Improved treatment strategies and targets may help to reduce the high mortality rate in esophageal cancer [47].

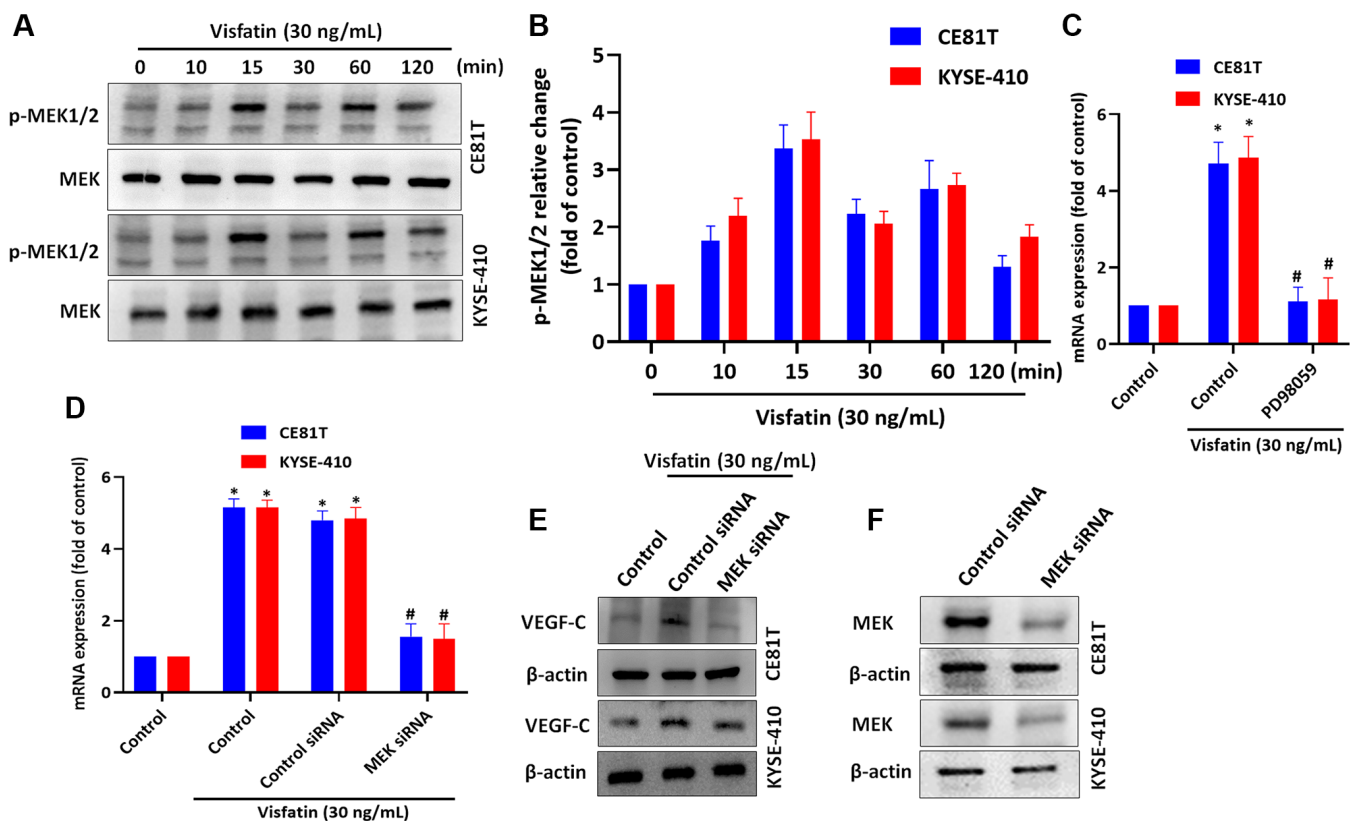

**Figure 5. Visfatin induced increases in VEGF-C expression and lymphangiogenesis by activating MEK1/2 signaling.** (A, B) ESCC cells were treated with visfatin (30 ng/mL) for the indicated times and then MEK1/2 phosphorylation was examined by Western blot and quantified by ImageJ software. (C, D) ESCC cells were transfected or preincubated with the MEK1/2 inhibitor PD98059 or siRNAs for 24 h, before determining levels of VEGF-C expression by qPCR. (E) ESCC cells were transfected with MEK siRNA for 24 h, then stimulated with visfatin (30 ng/mL) for 24 h. Levels of VEGF-C expression were examined by Western blot. (F) ESCCs were transfected with a MEK siRNA and MEK expression was examined by Western blot. \* $P < 0.05$  compared with the control group; # $P < 0.05$  compared with the visfatin-treated group.

Adipocytokines are implicated in the carcinogenesis, progression, recurrence, and metastasis of different cancers [48]. Patients with ESCC and EA presented lower adiponectin levels than controls. In brief, patients with EA had significantly lower adiponectin than those with ESCC [49], while lower resistin mRNA expression was identified in ESCC tissue and serum compared with normal esophageal tissues [50]. In addition, levels of serum nesfatin-1 were lowered in lung cancer patients than in healthy subjects [50], the same case were found in ometin-1 [51]. Moreover, the levels of leptin were significantly correlated with lymph node involvement and advanced tumor stage esophageal squamous cell carcinoma [52]. Visfatin in particular appears to have a vital role in cancer and inflammation [53, 54]. The visfatin-neurogenic locus notch homolog protein 1 (Notch-1) pathway contributes to breast cancer development by activating NF- $\kappa$ B signaling [55], while high circulating visfatin levels reportedly significantly increase the risk of cancer [56]. Visfatin also appears to promote chondrosarcoma metastasis [57]. In addition,

plasma visfatin levels are elevated in patients with type 2 diabetes mellitus [58], while serum visfatin levels are elevated in the peripheral blood of patients with breast cancer [59]. In this study, we found increasingly higher levels of visfatin corresponding with higher disease stage in ESCC tissue compared with normal tissue. Thus, visfatin may serve as a new therapeutic target in the treatment of cancer metastasis.

Lymphangiogenesis favors the development of cancer metastasis [60]. Increased levels of lymphangiogenic genes promote tumor relapse and poor prognosis, and thus serve as potential targets for preventing lymphatic metastasis [61]. This is supported by our study evidence, which identified that lymphangiogenic gene expression in ESCC clinical samples has clinical significance for survival. Other research has also reported that visfatin stimulates the production of human endothelial VEGF and matrix metalloproteinases (MMP-2 and MMP-9) in human umbilical vein endothelial cells [62]. In our study, visfatin significantly and dose-dependently upregulated

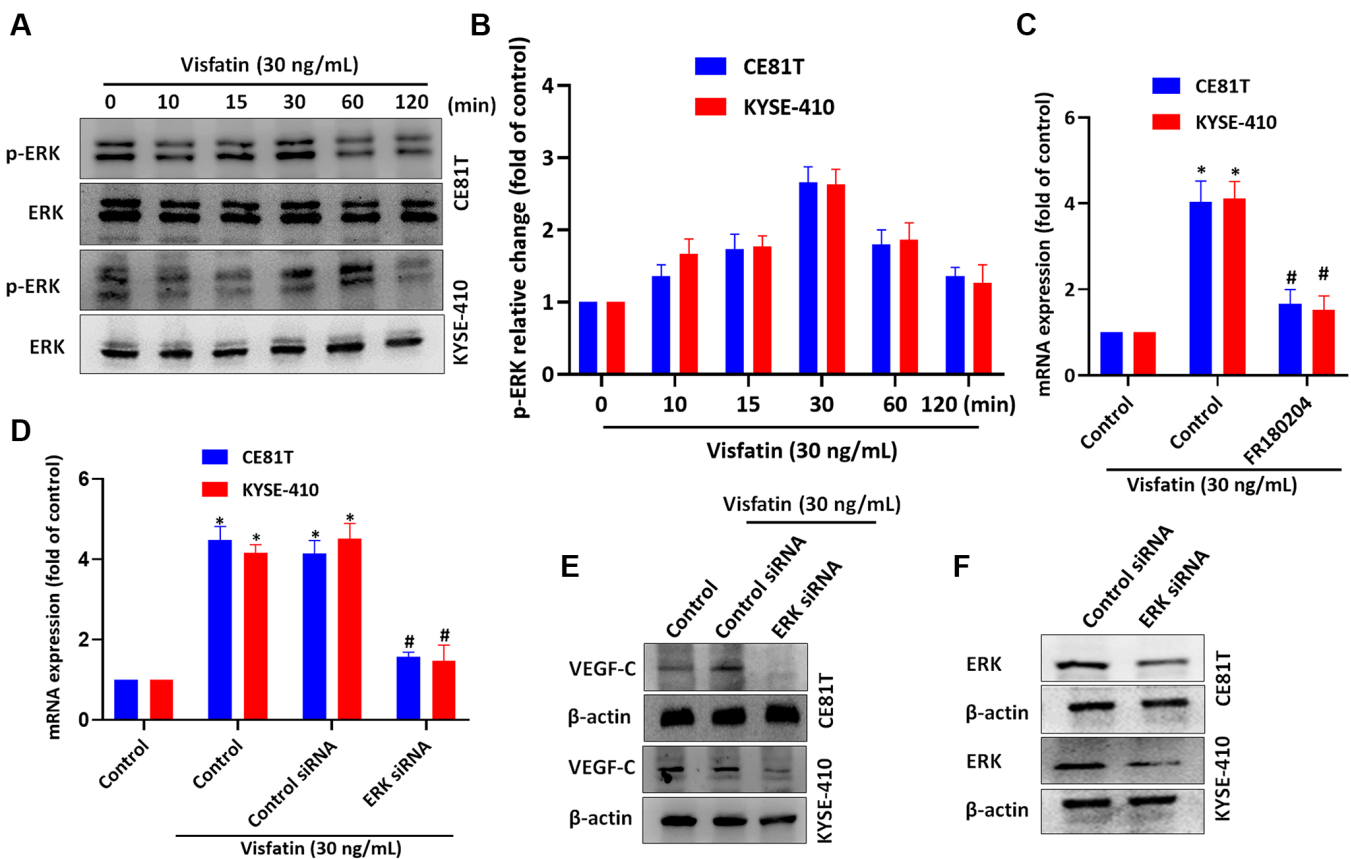

**Figure 6. Visfatin induced increases in levels of VEGF-C expression and lymphangiogenesis by activating ERK signaling.** (A, B) ESCC cells were treated with visfatin (30 ng/mL) for the indicated times and then ERK phosphorylation was examined by Western blot and quantified by ImageJ software. (C, D) ESCC cells were transfected or preincubated with the ERK inhibitor FR180204 or siRNAs for 24 h and then VEGF-C expression levels were measured by qPCR. (E) ESCC cells were transfected with ERK siRNA for 24 h, then stimulated with visfatin (30 ng/mL) for 24 h. Levels of VEGF-C expression were examined by Western blot. (F) ESCCs were transfected with a ERK siRNA and ERK expression was examined by Western blot. \* $P < 0.05$  compared with the control group; # $P < 0.05$  compared with the visfatin-treated group.



levels of VEGF-C gene expression and protein production in ESCC cells. Visfatin also dose-dependently promoted LEC tube formation. Interestingly, visfatin-mediated lymphangiogenesis was significantly inhibited by VEGF-C mAb treatment. Our findings offer novel insights into the effects of visfatin upon VEGF-C-dependent lymphangiogenesis in ESCC.

The mitogen-activated protein kinase (MAPK) signaling pathways play crucial roles in the survival of disseminated tumor cells and cancer drug resistance [63]. Several drugs have been developed that specifically target the MAPK signaling pathway network; these drugs help to overcome cancer cell drug resistance and sensitivity [41]. Previous studies have demonstrated that MAPK signaling pathways promote VEGF-A secretion and angiogenesis, as well as osteosarcoma metastasis [64]. Notably, MAPK signaling regulates angiogenic and lymphangiogenic cytokine production in head and neck

SCC [32]. In this study, MEK1/2-ERK inhibitors and siRNAs reversed visfatin-induced stimulation of VEGF-C expression.

NF- $\kappa$ B is a critical transcription factor in cancer [65] and cancer-associated disease [66]. Targeting NF- $\kappa$ B activity is a prominent strategy in the treatment of various cancers [67], including esophageal adenocarcinoma [68]. NF- $\kappa$ B activation is also associated with chemoresistance and the metastasis of esophageal cancer [69, 70]. The NF- $\kappa$ B signaling pathway is constitutively activated in ESCC cell lines and RNA interference targeting at p65 increases the sensitivity of ESCC cell lines to 5-fluorouracil chemotherapy [71]. In addition, higher levels of NF- $\kappa$ B protein expression in esophageal cancer tissue compared with adjacent normal esophageal mucosa [72]. Our findings indicate the involvement of p65 phosphorylation in visfatin-induced production of VEGF-C. According to our evidence, visfatin-mediated production of VEGF-C

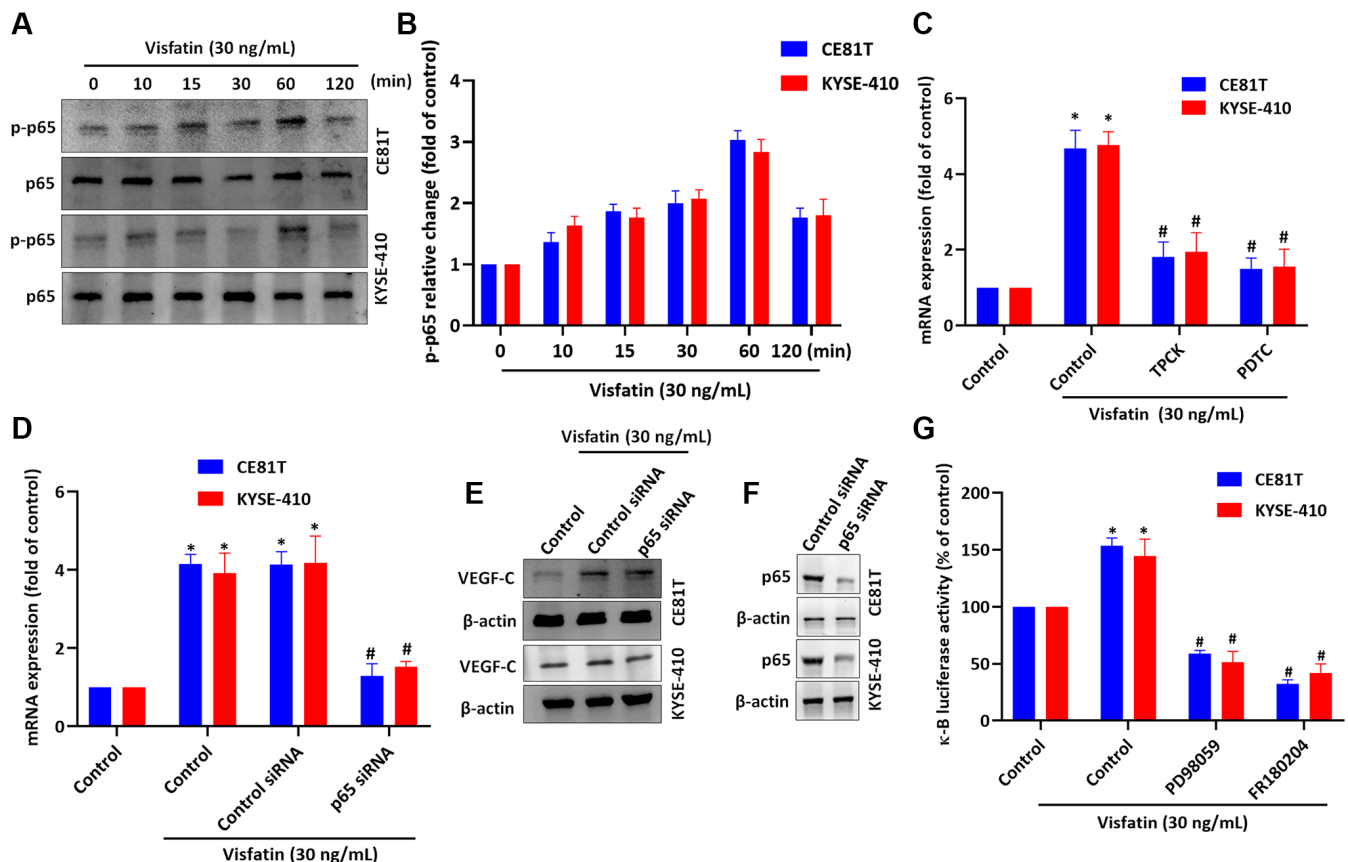

**Figure 7. Visfatin induced increases in VEGF-C expression and lymphangiogenesis by activating NF- $\kappa$ B signaling.** (A, B) ESCC cells were treated with visfatin (30 ng/mL) for the indicated times and then p65 phosphorylation was examined by Western blot and quantified by ImageJ software. (C, D) ESCC cells were transfected or preincubated with NF- $\kappa$ B inhibitors (PDTC and TPCK) or siRNAs for 24 h and then VEGF-C expression levels were measured by qPCR. (E) ESCC cells were transfected with p65 siRNA for 24 h, then stimulated with visfatin (30 ng/mL) for 24 h. Levels of VEGF-C expression were examined by Western blot. (F) ESCCs were transfected with a p65 siRNA and p65 expression was examined by Western blot. (G) ESCCs were treated with MEK and ERK inhibitors then stimulated with visfatin, and NF- $\kappa$ B luciferase activity was examined. \* $P < 0.05$  compared with the control group; # $P < 0.05$  compared with the visfatin-treated group.

is critical in ESCC progression and MEK1/2-ERK and NF- $\kappa$ B signaling is critical for ESCC lymphangiogenesis. No specific receptor has yet been identified for visfatin, although visfatin activity appears to be mediated by enzymatic activity [73–75] and also by an insulin receptor [76].

Finally, it should be noted that several limitations exist in this study. Firstly, although our data strongly suggest that visfatin enhances VEGF-C-dependent LEC tube formation in ESCCs, we cannot exclude the possibility that crosstalk exists between visfatin and its receptor, so we would like to address this limitation in future projects. Secondly, the impact of NF- $\kappa$ B on ESCC progression and lymphangiogenesis needs to be assessed in animal disease models. We hope to use NF- $\kappa$ B inhibitors to study *in vivo* ESCC progression and lymphangiogenesis. Thirdly, our data strongly suggest that visfatin and VEGF-C expression levels were higher in lymph node positive than in lymph node negative ESCC tissues, we cannot exclude the possibility that address the accurate observation of lymphatic vessel infiltration. Primarily, access to tumor tissue may not always be feasible due to increasingly competing demands for tumor tissue in research and clinical practice.

## CONCLUSIONS

In this study, data from the GEO and TCGA databases demonstrated significantly higher levels of visfatin and VEGF-C expression in ESCC tissue samples compared

with levels in adjacent normal tissue, and positive correlations were observed between visfatin and VEGF-C expression with ESCC clinical disease stages. Our experiments indicate that the MEK1/2-ERK and NF- $\kappa$ B pathways are involved in visfatin-mediated upregulation of VEGF-C and VEGF-C-dependent lymphangiogenesis in ESCC cells (Figure 8). Thus, visfatin and VEGF-C may represent new molecular therapeutic targets for inhibiting ESCC lymphangiogenesis.

## MATERIALS AND METHODS

### Materials

Recombinant human visfatin was purchased from PeproTech, Inc. (Rocky Hill, NJ, USA). VEGF-C (sc-9047) and IgG (sc-69786) monoclonal antibodies were purchased from Santa Cruz Biotechnology (Santa Cruz, CA, USA). The cell culture mediums Dulbecco's Modified Eagle Medium (DMEM) and Roswell Park Memorial Institute (RPMI) 1640 were purchased from Gibco Life Technologies Corporation (Grand Island, NY, USA). Chloroform and isopropanol were purchased from J.T. Baker (NJ, USA). Oligo-dT was obtained from MDBio Inc. (Gaithersburg, Maryland, USA). Dithiothreitol (DTT), dNTP, MMLV and 5X first-strand buffer were purchased from Invitrogen Corporation (Carlsbad, California, USA). Taqman<sup>®</sup> One-Step PCR Master Mix, qPCR primers and probes were bought from Applied Biosystems (Foster City, CA, USA). A BCA protein assay kit was obtained from Pierce (Meridian Rd.

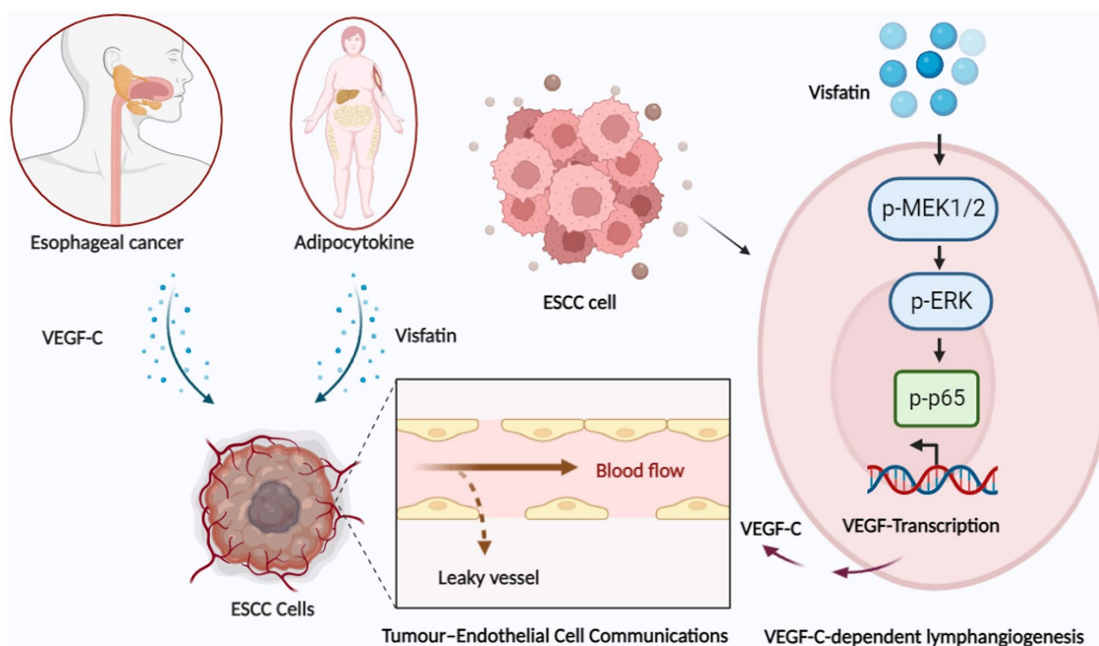

Figure 8. Schematic illustration of how signaling pathways participate in visfatin-induced stimulation of VEGF-C expression and the subsequent stimulation of ESCC lymphangiogenesis in esophageal cancer.

Rockford, IL 61101 USA). Tri's buffer, 30% acrylamide and sodium dodecyl sulfate-polyacrylamide gel electrophoresis (SDS-PAGE) were purchased from Amresco Inc (6681 Cochran Rd, Solon, Ohio, USA). The detailed source of inhibitors and siRNAs are listed in Supplementary Tables 1 and 2. All other chemical reagents not already mentioned were obtained from Sigma-Aldrich (St. Louis, MO, USA).

### Cell culture

The well-differentiated human ESCC cell line CE81T/VGH was obtained from the Bioresource Collection and Research Center (BCRC, Hsinchu, Taiwan, ROC) and cultured in DMEM. The poorly differentiated invasive ESCC cell line KYSE-410 was obtained from the European Collection of Cell Culture (ECACC®) (Porton Down, SP4 0JG Salisbury, UK) and cultured in RPMI. The culture medium contained 10% fetal bovine serum (FBS) (Lonza, Walkersville, MD, USA) and streptomycin/penicillin (PS) 100 U/mL.

Human telomerase gene-immortalized human dermal lymphatic endothelial cells (hTERT-HDLECs), an immortalized human LEC line, was purchased from Lonza (Walkersville, MD, USA). The LECs were grown in EGM-2 MV BulletKit Medium, consisting of endothelial basal medium-2 (EBM-2) plus a SingleQuots kit (Lonza). Cells were seeded onto culture dishes precoated with 1% gelatin. Cell incubation was conducted in a humidified atmosphere of 37°C, 5% CO<sub>2</sub> [39, 77].

### Bioinformatics analysis

The GSE23400 dataset was downloaded from the GEO database and examined for levels of visfatin and VEGF-C expression in human ESCC and normal tissue samples. Differential gene expression analysis from the TCGA database has identified an inverse relationship between visfatin and VEGF-C transcript levels in ESCC and adjacent normal tissue samples [78, 79].

### Cell viability assay

ESCC cells were incubated with indicating concentrations of visfatin for 24 h then cell viability was determined with the 3-(4,5-dimethylthiazol-2-yl)-2,5-diphenyltetrazolium bromide (MTT) assay over 2 h. Dimethyl sulfoxide (DMSO) was applied, and cell viability were detected on a microplate reader.

### Quantitative real-time PCR

Total RNA was extracted from ESCC cells using TRIzol™ Reagent (MDBio, Taipei, Taiwan) and RNA quality was analyzed by a NanoVue Plus™ Spectrophotometer

(Biochrom Ltd., Cambridge, UK). A MMLV Kit (Thermo Fisher Scientific; Waltham, MA, USA) used 1-3 (μg/μL) of total RNA to convert RNA to cDNA. The converted cDNA was amplified with primers (primers used in the qPCR assays are listed in Supplementary Table 3) using the StepOnePlus™ Real-Time PCR System (Applied Biosystems, Foster City, CA, USA) [57, 80, 81].

### Western blot

Total proteins were extracted using RIPA lysis buffer containing protease inhibitors, then quantified with the BCA Protein Assay Kit (Thermo Fisher Scientific Inc., Waltham, MA, USA). 30 μg of total proteins were separated by SDS-PAGE electrophoresis then transferred to polyvinylidene difluoride (PVDF) membranes (Millipore, Bedford, MA, USA). The blots were blocked with 4% BSA, then incubated with primary antibodies overnight (antibodies used in the Western blot assays are listed in Supplementary Table 4). The blots were then incubated with horseradish peroxidase (HRP) conjugated secondary antibodies at room temperature for 1 h. Enhanced chemiluminescent imaging of the blots was visualized by the UVP Biospectrum system (UVP, Upland, CA, USA) [82–84].

### ELISA

ESCC cells were plated in 6-well dishes and grown to confluence. The culture medium was then exchanged with serum-free RPMI or DMEM medium. Cells were treated for 24 h with visfatin (0, 1, 3, 10, or 30 ng/mL). CM was collected and the levels of VEGF-C expression were examined using a human VEGF-C ELISA kit (R&D Systems, MN, USA) according to the manufacturer's protocol [79, 85].

### Tube formation

Matrigel (BD Biosciences; Bedford, MA, USA) was dissolved at 4°C, then added at a concentration of 100 μL to each well of 48-well plates and incubated at 37°C for 30 min. Briefly, LECs were resuspended in MV2 serum-free medium and mixed with the CM from the visfatin-treated cells (0, 1, 3, 10, or 30 ng/mL), before being added to the wells. After 6–8 h of incubation at 37°C, LEC tube formation was examined by microscopy. Tube branches and lengths were examined at a magnification of 20X and quantified by MacBiophotonics ImageJ software (v1.51, National Institutes of Health, Bethesda, MD, USA) [79, 86].

### Tissue array

A Human ESCC Tissue Array was supplied by US Biomax (Derwood, Maryland, USA). The sections were

deparaffinized with xylene and rehydrated with ethanol for immunohistochemistry (IHC) staining [87–89]. The sections were immunoassayed with visfatin and VEGF-C antibodies (1:200) overnight, then incubated with secondary antibody (1:200) for 1 h at room temperature. Finally, all tissues were stained with 3,3-diaminobenzidine and photographed using a ImageXpress Pico (Molecular Devices, San Jose, CA, USA). Assessment of lymphatic vessels in N0, N1 and N2 tumor tissue were reviewed independently in a blinded manner by two observers. Assessments at different parameters of the tumor tissue sought to identify vascular hotspots and positive microvessels. Counting was repeated for the whole set of tissue sections to quantify the reproducibility of the methodology. Levels of visfatin and VEGF-C expression are described using a scoring system including staining intensity and percentages of stained tumor cells. Moderate or strong staining was assessed as a positive expression of visfatin or VEGF-C in tumor tissues.

### NF- $\kappa$ B luciferase assay

The NF- $\kappa$ B luciferase plasmid (Stratagene; St. Louis, MO, USA) was transfected into ESCCs using Lipofectamine™ 2000 Transfection Reagent (Thermo Fisher Scientific, Carlsbad, CA, USA), followed by treatment with pharmacological inhibitors of MEK and ERK. The Dual-luciferase® Reporter Assay System was used to examine luciferase activity (Promega, Madison, WI, USA).

### Statistical analysis

All statistical analyses were performed using GraphPad Prism version 5.0 (GraphPad Software). All results are expressed as the mean  $\pm$  standard deviation (SD) of at least three independent experiments. The Student's *t*-test compared the means between experimental groups. The statistical difference was significant if the *p*-value was  $< 0.05$ .

### AUTHOR CONTRIBUTIONS

Conceptualization, C.-L.H., D.A. and C.-H.T.; methodology, C.-L.H. and D.A.; software, C.-L.H., P.-I.L. and J.-H.G.; validation, C.-L.H., D.A. and Y.-Y.L.; formal analysis, C.-L.H., C.-L.L. and C.Y.W.; investigation, C.-L.H. and P.-I.L.; resources, C.-H.T. and S.-W.W.; data curation, C.-L.H.; writing-original draft preparation, C.-L.H. and D.A.; writing-review and editing, C.-L.H., D.A. and C.-H.T.; visualization, S.-C.L.; supervision, C.-H.T.; project administration, C.-H.T.; funding acquisition, C.-H.T. All authors have read and agreed to the published version of the manuscript.

### ACKNOWLEDGMENTS

We would like to thank Iona J. MacDonald from China Medical University for her English language revision of this manuscript.

### CONFLICTS OF INTEREST

The authors declare no conflicts of interest related to this study.

### FUNDING

This research was funded by China Medical University Hospital (DMR-112-081; DMR-112-077), China Medical University Hsinchu Hospital (CMUHCH-CMU-112-001) and China Medical University (CMU111-ASIA-04).

### REFERENCES

1. Sung H, Ferlay J, Siegel RL, Laversanne M, Soerjomataram I, Jemal A, Bray F. Global Cancer Statistics 2020: GLOBOCAN Estimates of Incidence and Mortality Worldwide for 36 Cancers in 185 Countries. *CA Cancer J Clin.* 2021; 71:209–49. <https://doi.org/10.3322/caac.21660> PMID:33538338
2. Zhang HZ, Jin GF, Shen HB. Epidemiologic differences in esophageal cancer between Asian and Western populations. *Chin J Cancer.* 2012; 31:281–6. <https://doi.org/10.5732/cjc.011.10390> PMID:22507220
3. Cancer Registry Annual Report 2019 Taiwan. Ministry of Health and Welfare Taiwan. 2021.
4. Schoppmann SF, Jesch B, Zacherl J, Riegler MF, Friedrich J, Birner P. Lymphangiogenesis and lymphovascular invasion diminishes prognosis in esophageal cancer. *Surgery.* 2013; 153:526–34. <https://doi.org/10.1016/j.surg.2012.10.007> PMID:23294880
5. Wang A, Tan Y, Geng X, Chen X, Wang S. Lymphovascular invasion as a poor prognostic indicator in thoracic esophageal carcinoma: a systematic review and meta-analysis. *Dis Esophagus.* 2019; 32. <https://doi.org/10.1093/dote/doy083> PMID:30169614
6. Yang J, Lu Z, Li L, Li Y, Tan Y, Zhang D, Wang A. Relationship of lymphovascular invasion with lymph node metastasis and prognosis in superficial esophageal carcinoma: systematic review and meta-analysis. *BMC Cancer.* 2020; 20:176.



- <https://doi.org/10.1186/s12885-020-6656-3>  
PMID:[32131772](https://pubmed.ncbi.nlm.nih.gov/32131772/)
7. Rice TW, Patil DT, Blackstone EH. 8th edition AJCC/UICC staging of cancers of the esophagus and esophagogastric junction: application to clinical practice. *Ann Cardiothorac Surg*. 2017; 6:119–30.  
<https://doi.org/10.21037/acs.2017.03.14>  
PMID:[28447000](https://pubmed.ncbi.nlm.nih.gov/28447000/)
  8. Christiansen A, Detmar M. Lymphangiogenesis and cancer. *Genes Cancer*. 2011; 2:1146–58.  
<https://doi.org/10.1177/1947601911423028>  
PMID:[22866206](https://pubmed.ncbi.nlm.nih.gov/22866206/)
  9. Chang HC, Yang HC, Chang HY, Yeh CJ, Chen HH, Huang KC, Pan WH. Morbid obesity in Taiwan: Prevalence, trends, associated social demographics, and lifestyle factors. *PLoS One*. 2017; 12:e0169577.  
<https://doi.org/10.1371/journal.pone.0169577>  
PMID:[28152059](https://pubmed.ncbi.nlm.nih.gov/28152059/)
  10. Hsieh TH, Lee JJ, Yu EW, Hu HY, Lin SY, Ho CY. Association between obesity and education level among the elderly in Taipei, Taiwan between 2013 and 2015: a cross-sectional study. *Sci Rep*. 2020; 10:20285.  
<https://doi.org/10.1038/s41598-020-77306-5>  
PMID:[33219305](https://pubmed.ncbi.nlm.nih.gov/33219305/)
  11. Annett S, Moore G, Robson T. Obesity and Cancer Metastasis: Molecular and Translational Perspectives. *Cancers (Basel)*. 2020; 12:3798.  
<https://doi.org/10.3390/cancers12123798>  
PMID:[33339340](https://pubmed.ncbi.nlm.nih.gov/33339340/)
  12. Lin CJ, Chang YC, Hsu HY, Tsai MC, Hsu LY, Hwang LC, Chien KL, Yeh TL. Metabolically healthy overweight/obesity and cancer risk: A representative cohort study in Taiwan. *Obes Res Clin Pract*. 2021; 15:564–9.  
<https://doi.org/10.1016/j.orcp.2021.10.004>  
PMID:[34782258](https://pubmed.ncbi.nlm.nih.gov/34782258/)
  13. Ouchi N, Parker JL, Lugus JJ, Walsh K. Adipokines in inflammation and metabolic disease. *Nat Rev Immunol*. 2011; 11:85–97.  
<https://doi.org/10.1038/nri2921>  
PMID:[21252989](https://pubmed.ncbi.nlm.nih.gov/21252989/)
  14. Rana MN, Neeland IJ. Adipose Tissue Inflammation and Cardiovascular Disease: An Update. *Curr Diab Rep*. 2022; 22:27–37.  
<https://doi.org/10.1007/s11892-021-01446-9>  
PMID:[35179694](https://pubmed.ncbi.nlm.nih.gov/35179694/)
  15. de Liyis BG, Nolan J, Maharjana MA. Fibroblast growth factor receptor 1-bound extracellular vesicle as novel therapy for osteoarthritis. *Biomedicine (Taipei)*. 2022; 12:1–9.  
<https://doi.org/10.37796/2211-8039.1308>  
PMID:[35836973](https://pubmed.ncbi.nlm.nih.gov/35836973/)
  16. Akrida I, Papadaki H. Adipokines and epithelial-mesenchymal transition (EMT) in cancer. *Mol Cell Biochem*. 2023. [Epub ahead of print].  
<https://doi.org/10.1007/s11010-023-04670-x>  
PMID:[36715963](https://pubmed.ncbi.nlm.nih.gov/36715963/)
  17. Huang CY, Chang AC, Chen HT, Wang SW, Lo YS, Tang CH. Adiponectin promotes VEGF-C-dependent lymphangiogenesis by inhibiting miR-27b through a CaMKII/AMPK/p38 signaling pathway in human chondrosarcoma cells. *Clin Sci (Lond)*. 2016; 130:1523–33.  
<https://doi.org/10.1042/CS20160117>  
PMID:[27252405](https://pubmed.ncbi.nlm.nih.gov/27252405/)
  18. Jung JI, Cho HJ, Jung YJ, Kwon SH, Her S, Choi SS, Shin SH, Lee KW, Park JH. High-fat diet-induced obesity increases lymphangiogenesis and lymph node metastasis in the B16F10 melanoma allograft model: roles of adipocytes and M2-macrophages. *Int J Cancer*. 2015; 136:258–70.  
<https://doi.org/10.1002/ijc.28983>  
PMID:[24844408](https://pubmed.ncbi.nlm.nih.gov/24844408/)
  19. Su CM, Tang CH, Chi MJ, Lin CY, Fong YC, Liu YC, Chen WC, Wang SW. Resistin facilitates VEGF-C-associated lymphangiogenesis by inhibiting miR-186 in human chondrosarcoma cells. *Biochem Pharmacol*. 2018; 154:234–42.  
<https://doi.org/10.1016/j.bcp.2018.05.001>  
PMID:[29730230](https://pubmed.ncbi.nlm.nih.gov/29730230/)
  20. Lin TC. The role of visfatin in cancer proliferation, angiogenesis, metastasis, drug resistance and clinical prognosis. *Cancer Manag Res*. 2019; 11:3481–91.  
<https://doi.org/10.2147/CMAR.S199597>  
PMID:[31114381](https://pubmed.ncbi.nlm.nih.gov/31114381/)
  21. Fukuhara A, Matsuda M, Nishizawa M, Segawa K, Tanaka M, Kishimoto K, Matsuki Y, Murakami M, Ichisaka T, Murakami H, Watanabe E, Takagi T, Akiyoshi M, et al. Visfatin: a protein secreted by visceral fat that mimics the effects of insulin. *Science*. 2005; 307:426–30.  
<https://doi.org/10.1126/science.1097243>  
PMID:[15604363](https://pubmed.ncbi.nlm.nih.gov/15604363/)
  22. Cymbaluk-Płoska A, Chudecka-Głaz A, Pius-Sadowska E, Sompolska-Rzechuła A, Machaliński B, Menkiszak J. Circulating Serum Level of Visfatin in Patients with Endometrial Cancer. *Biomed Res Int*. 2018; 2018:8576179.  
<https://doi.org/10.1155/2018/8576179>  
PMID:[29516012](https://pubmed.ncbi.nlm.nih.gov/29516012/)
  23. Sun Y, Zhu S, Wu Z, Huang Y, Liu C, Tang S, Wei L. Elevated serum visfatin levels are associated with poor prognosis of hepatocellular carcinoma. *Oncotarget*. 2017; 8:23427–35.  
<https://doi.org/10.18632/oncotarget.15080>  
PMID:[28178643](https://pubmed.ncbi.nlm.nih.gov/28178643/)

24. Cao Z, Liang N, Yang H, Li S. Visfatin mediates doxorubicin resistance in human non-small-cell lung cancer via Akt-mediated up-regulation of ABCC1. *Cell Prolif*. 2017; 50:e12366. <https://doi.org/10.1111/cpr.12366> PMID:28762597
25. Ji C, Cong R, Wang Y, Wang Y, Zhang Q, Zhou X, Xing Q, Song N. Relationship between NAMPT/PBEF/visfatin and prognosis of patients with malignant tumors: a systematic review and meta-analysis. *Ann Transl Med*. 2019; 7:785. <https://doi.org/10.21037/atm.2019.11.32> PMID:32042801
26. Mohammadi M, Moradi A, Farhadi J, Akbari A, Pourmandi S, Mehrad-Majd H. Prognostic value of visfatin in various human malignancies: A systematic review and meta-analysis. *Cytokine*. 2020; 127:154964. <https://doi.org/10.1016/j.cyto.2019.154964> PMID:31901760
27. Zheng W, Aspelund A, Alitalo K. Lymphangiogenic factors, mechanisms, and applications. *J Clin Invest*. 2014; 124:878–87. <https://doi.org/10.1172/JCI71603> PMID:24590272
28. Tammela T, Enholm B, Alitalo K, Paavonen K. The biology of vascular endothelial growth factors. *Cardiovasc Res*. 2005; 65:550–63. <https://doi.org/10.1016/j.cardiores.2004.12.002> PMID:15664381
29. Chen JC, Chang YW, Hong CC, Yu YH, Su JL. The role of the VEGF-C/VEGFRs axis in tumor progression and therapy. *Int J Mol Sci*. 2012; 14:88–107. <https://doi.org/10.3390/ijms14010088> PMID:23344023
30. Omoto I, Matsumoto M, Okumura H, Uchikado Y, Setoyama T, Kita Y, Owaki T, Kijima Y, Shinchi H, Ishigami S, Ueno S, Natsugoe S. Expression of vascular endothelial growth factor-C and vascular endothelial growth factor receptor-3 in esophageal squamous cell carcinoma. *Oncol Lett*. 2014; 7:1027–32. <https://doi.org/10.3892/ol.2014.1823> PMID:24944663
31. Tullavardhana T, Akranurakkul P, Ungkitphaiboon W, Songtish D. Vascular endothelial growth factor-C expression as a biomarker of poor prognosis in esophageal squamous cell carcinoma: a meta-analysis. *Oncol Res Treat*. 2015; 38:110–4. <https://doi.org/10.1159/000380776> PMID:25792082
32. Luangdilok S, Box C, Harrington K, Rhys-Evans P, Eccles S. MAPK and PI3K signalling differentially regulate angiogenic and lymphangiogenic cytokine secretion in squamous cell carcinoma of the head and neck. *Eur J Cancer*. 2011; 47:520–9. <https://doi.org/10.1016/j.ejca.2010.10.009> PMID:21074412
33. Su C, Chen Z, Luo H, Su Y, Liu W, Cai L, Wang T, Lei Y, Zhong B. Different patterns of NF- $\kappa$ B and Notch1 signaling contribute to tumor-induced lymphangiogenesis of esophageal squamous cell carcinoma. *J Exp Clin Cancer Res*. 2011; 30:85. <https://doi.org/10.1186/1756-9966-30-85> PMID:21939555
34. Li Q, Tie Y, Alu A, Ma X, Shi H. Targeted therapy for head and neck cancer: signaling pathways and clinical studies. *Signal Transduct Target Ther*. 2023; 8:31. <https://doi.org/10.1038/s41392-022-01297-0> PMID:36646686
35. Kim JG, Kim EO, Jeong BR, Min YJ, Park JW, Kim ES, Namgoong IS, Kim YI, Lee BJ. Visfatin stimulates proliferation of MCF-7 human breast cancer cells. *Mol Cells*. 2010; 30:341–5. <https://doi.org/10.1007/s10059-010-0124-x> PMID:20848232
36. Yu-Duan T, Chao-Ping W, Chih-Yu C, Li-Wen L, Tsun-Mei L, Chia-Chang H, Fu-Mei C, Hsien-Chang L, Hsia-Fen H, Yau-Jiunn L, Jer-Yiing H. Elevated plasma level of visfatin/pre-b cell colony-enhancing factor in male oral squamous cell carcinoma patients. *Med Oral Patol Oral Cir Bucal*. 2013; 18:e180–6. <https://doi.org/10.4317/medoral.18574> PMID:23229270
37. Lu GW, Wang QJ, Xia MM, Qian J. Elevated plasma visfatin levels correlate with poor prognosis of gastric cancer patients. *Peptides*. 2014; 58:60–4. <https://doi.org/10.1016/j.peptides.2014.05.016> PMID:24911837
38. Lien MY, Tsai HC, Chang AC, Tsai MH, Hua CH, Wang SW, Tang CH. Chemokine CCL4 Induces Vascular Endothelial Growth Factor C Expression and Lymphangiogenesis by miR-195-3p in Oral Squamous Cell Carcinoma. *Front Immunol*. 2018; 9:412. <https://doi.org/10.3389/fimmu.2018.00412> PMID:29599774
39. Lin CY, Wang SW, Guo JH, Tai HC, Sun WC, Lai CT, Yang CY, Liu SC, Fong YC, Tang CH. WISP-3 Stimulates VEGF-C-Dependent Lymphangiogenesis in Human Chondrosarcoma Cells by Inhibiting miR-196a-3p Synthesis. *Biomedicines*. 2021; 9:1330. <https://doi.org/10.3390/biomedicines9101330> PMID:34680447
40. Huang P, Han J, Hui L. MAPK signaling in inflammation-associated cancer development. *Protein Cell*. 2010; 1:218–26.

- <https://doi.org/10.1007/s13238-010-0019-9>  
PMID:21203968
41. Lee S, Rauch J, Kolch W. Targeting MAPK Signaling in Cancer: Mechanisms of Drug Resistance and Sensitivity. *Int J Mol Sci.* 2020; 21:1102.  
<https://doi.org/10.3390/ijms21031102>  
PMID:32046099
42. Lehman HL, Kidacki M, Warrick JI, Stairs DB. NFkB hyperactivation causes invasion of esophageal squamous cell carcinoma with EGFR overexpression and p120-catenin down-regulation. *Oncotarget.* 2018; 9:11180–96.  
<https://doi.org/10.18632/oncotarget.24358>  
PMID:29541406
43. Lin C, Song L, Gong H, Liu A, Lin X, Wu J, Li M, Li J. Nkx2-8 downregulation promotes angiogenesis and activates NF-κB in esophageal cancer. *Cancer Res.* 2013; 73:3638–48.  
<https://doi.org/10.1158/0008-5472.CAN-12-4028>  
PMID:23604637
44. Napier KJ, Scheerer M, Misra S. Esophageal cancer: A Review of epidemiology, pathogenesis, staging workup and treatment modalities. *World J Gastrointest Oncol.* 2014; 6:112–20.  
<https://doi.org/10.4251/wjgo.v6.i5.112>  
PMID:24834141
45. Li D, Zhang L, Liu Y, Sun H, Onwuka JU, Zhao Z, Tian W, Xu J, Zhao Y, Xu H. Specific DNA methylation markers in the diagnosis and prognosis of esophageal cancer. *Aging (Albany NY).* 2019; 11:11640–58.  
<https://doi.org/10.18632/aging.102569>  
PMID:31834866
46. Wang L, Han H, Wang Z, Shi L, Yang M, Qin Y. Targeting the Microenvironment in Esophageal Cancer. *Front Cell Dev Biol.* 2021; 9:684966.  
<https://doi.org/10.3389/fcell.2021.684966>  
PMID:34513829
47. He S, Xu J, Liu X, Zhen Y. Advances and challenges in the treatment of esophageal cancer. *Acta Pharm Sin B.* 2021; 11:3379–92.  
<https://doi.org/10.1016/j.apsb.2021.03.008>  
PMID:34900524
48. Saygin C, Reizes O, Berger NA. Adipocytes, Adipocytokines, and Cancer. In: Reizes O, Berger NA, eds. *Adipocytokines, Energy Balance, and Cancer.* Cham: Springer International Publishing. 2017; 1–19.
49. Dalamaga M, Diakopoulos KN, Mantzoros CS. The role of adiponectin in cancer: a review of current evidence. *Endocr Rev.* 2012; 33:547–94.  
<https://doi.org/10.1210/er.2011-1015>  
PMID:22547160
50. Hung AC, Wang YY, Lee KT, Chiang HH, Chen YK, Du JK, Chen CM, Chen MY, Chen KJ, Hu SC, Yuan SF. Reduced tissue and serum resistin expression as a clinical marker for esophageal squamous cell carcinoma. *Oncol Lett.* 2021; 22:774.  
<https://doi.org/10.3892/ol.2021.13035>  
PMID:34589153
51. Parida S, Siddharth S, Sharma D. Role of Omentin in Obesity Paradox in Lung Cancer. *Cancers (Basel).* 2021; 13:275.  
<https://doi.org/10.3390/cancers13020275>  
PMID:33450975
52. Ray A, Cleary MP. The potential role of leptin in tumor invasion and metastasis. *Cytokine Growth Factor Rev.* 2017; 38:80–97.  
<https://doi.org/10.1016/j.cytogfr.2017.11.002>  
PMID:29158066
53. Wang YY, Chen HD, Lo S, Chen YK, Huang YC, Hu SC, Hsieh YC, Hung AC, Hou MF, Yuan SF. Visfatin Enhances Breast Cancer Progression through CXCL1 Induction in Tumor-Associated Macrophages. *Cancers (Basel).* 2020; 12:3526.  
<https://doi.org/10.3390/cancers12123526>  
PMID:33256011
54. Xiao K, Zou WH, Yang Z, Rehman ZU, Ansari AR, Yuan HR, Zhou Y, Cui L, Peng KM, Song H. The role of visfatin on the regulation of inflammation and apoptosis in the spleen of LPS-treated rats. *Cell Tissue Res.* 2015; 359:605–18.  
<https://doi.org/10.1007/s00441-014-1997-3>  
PMID:25358398
55. Park HJ, Kim SR, Kim SS, Wee HJ, Bae MK, Ryu MH, Bae SK. Visfatin promotes cell and tumor growth by upregulating Notch1 in breast cancer. *Oncotarget.* 2014; 5:5087–99.  
<https://doi.org/10.18632/oncotarget.2086>  
PMID:24970818
56. Mohammadi M, Mianabadi F, Mehrad-Majd H. Circulating visfatin levels and cancers risk: A systematic review and meta-analysis. *J Cell Physiol.* 2019; 234:5011–22.  
<https://doi.org/10.1002/jcp.27302>  
PMID:30471099
57. Hung SY, Lin CY, Yu CC, Chen HT, Lien MY, Huang YW, Fong YC, Liu JF, Wang SW, Chen WC, Tang CH. Visfatin Promotes the Metastatic Potential of Chondrosarcoma Cells by Stimulating AP-1-Dependent MMP-2 Production in the MAPK Pathway. *Int J Mol Sci.* 2021; 22:8642.  
<https://doi.org/10.3390/ijms22168642>  
PMID:34445345
58. Chen MP, Chung FM, Chang DM, Tsai JC, Huang HF, Shin SJ, Lee YJ. Elevated plasma level of visfatin/pre-B

- cell colony-enhancing factor in patients with type 2 diabetes mellitus. *J Clin Endocrinol Metab.* 2006; 91:295–9.  
<https://doi.org/10.1210/jc.2005-1475>  
PMID:[16234302](https://pubmed.ncbi.nlm.nih.gov/16234302/)
59. Huang JY, Wang YY, Lo S, Tseng LM, Chen DR, Wu YC, Hou MF, Yuan SF. Visfatin Mediates Malignant Behaviors through Adipose-Derived Stem Cells Intermediary in Breast Cancer. *Cancers (Basel).* 2019; 12:29.  
<https://doi.org/10.3390/cancers12010029>  
PMID:[31861872](https://pubmed.ncbi.nlm.nih.gov/31861872/)
60. Van Trappen PO, Pepper MS. Lymphatic dissemination of tumour cells and the formation of micrometastases. *Lancet Oncol.* 2002; 3:44–52.  
[https://doi.org/10.1016/s1470-2045\(01\)00621-0](https://doi.org/10.1016/s1470-2045(01)00621-0)  
PMID:[11905605](https://pubmed.ncbi.nlm.nih.gov/11905605/)
61. Dieterich LC, Seidel CD, Detmar M. Lymphatic vessels: new targets for the treatment of inflammatory diseases. *Angiogenesis.* 2014; 17:359–71.  
<https://doi.org/10.1007/s10456-013-9406-1>  
PMID:[24212981](https://pubmed.ncbi.nlm.nih.gov/24212981/)
62. Adya R, Tan BK, Punn A, Chen J, Randeve HS. Visfatin induces human endothelial VEGF and MMP-2/9 production via MAPK and PI3K/Akt signalling pathways: novel insights into visfatin-induced angiogenesis. *Cardiovasc Res.* 2008; 78:356–65.  
<https://doi.org/10.1093/cvr/cvm111>  
PMID:[18093986](https://pubmed.ncbi.nlm.nih.gov/18093986/)
63. Lu M, Wang Y, Zhan X. The MAPK Pathway-Based Drug Therapeutic Targets in Pituitary Adenomas. *Front Endocrinol (Lausanne).* 2019; 10:330.  
<https://doi.org/10.3389/fendo.2019.00330>  
PMID:[31231308](https://pubmed.ncbi.nlm.nih.gov/31231308/)
64. Tsai HC, Cheng SP, Han CK, Huang YL, Wang SW, Lee JJ, Lai CT, Fong YC, Tang CH. Resistin enhances angiogenesis in osteosarcoma via the MAPK signaling pathway. *Aging (Albany NY).* 2019; 11:9767–77.  
<https://doi.org/10.18632/aging.102423>  
PMID:[31719210](https://pubmed.ncbi.nlm.nih.gov/31719210/)
65. Godwin P, Baird AM, Heavey S, Barr MP, O'Byrne KJ, Gately K. Targeting nuclear factor-kappa B to overcome resistance to chemotherapy. *Front Oncol.* 2013; 3:120.  
<https://doi.org/10.3389/fonc.2013.00120>  
PMID:[23720710](https://pubmed.ncbi.nlm.nih.gov/23720710/)
66. Park MH, Hong JT. Roles of NF-κB in Cancer and Inflammatory Diseases and Their Therapeutic Approaches. *Cells.* 2016; 5:15.  
<https://doi.org/10.3390/cells5020015>  
PMID:[27043634](https://pubmed.ncbi.nlm.nih.gov/27043634/)
67. Xia Y, Shen S, Verma IM. NF-κB, an active player in human cancers. *Cancer Immunol Res.* 2014; 2:823–30.  
<https://doi.org/10.1158/2326-6066.CIR-14-0112>  
PMID:[25187272](https://pubmed.ncbi.nlm.nih.gov/25187272/)
68. Abdel-Latif MM, O'Riordan J, Windle HJ, Carton E, Ravi N, Kelleher D, Reynolds JV. NF-κB activation in esophageal adenocarcinoma: relationship to Barrett's metaplasia, survival, and response to neoadjuvant chemoradiotherapy. *Ann Surg.* 2004; 239:491–500.  
<https://doi.org/10.1097/01.sla.0000118751.95179.c6>  
PMID:[15024310](https://pubmed.ncbi.nlm.nih.gov/15024310/)
69. Wei L, Yan N, Sun L, Bao C, Li D. Interplay between the NF-κB and hedgehog signaling pathways predicts prognosis in esophageal squamous cell carcinoma following neoadjuvant chemoradiotherapy. *Int J Mol Med.* 2018; 41:2961–7.  
<https://doi.org/10.3892/ijmm.2018.3447>  
PMID:[29393402](https://pubmed.ncbi.nlm.nih.gov/29393402/)
70. Izzo JG, Correa AM, Wu TT, Malhotra U, Chao CK, Luthra R, Ensor J, Dekovich A, Liao Z, Hittelman WN, Aggarwal BB, Ajani JA. Pretherapy nuclear factor-kappaB status, chemoradiation resistance, and metastatic progression in esophageal carcinoma. *Mol Cancer Ther.* 2006; 5:2844–50.  
<https://doi.org/10.1158/1535-7163.MCT-06-0351>  
PMID:[17121931](https://pubmed.ncbi.nlm.nih.gov/17121931/)
71. Tian F, Zang WD, Hou WH, Liu HT, Xue LX. Nuclear factor-kB signaling pathway constitutively activated in esophageal squamous cell carcinoma cell lines and inhibition of growth of cells by small interfering RNA. *Acta Biochim Biophys Sin (Shanghai).* 2006; 38:318–26.  
<https://doi.org/10.1111/j.1745-7270.2006.00166.x>  
PMID:[16680372](https://pubmed.ncbi.nlm.nih.gov/16680372/)
72. Liu JF, Zhang SW, Jamieson GG, Zhu GJ, Wu TC, Zhu TN, Shan BE, Drew PA. The effects of a COX-2 inhibitor meloxicam on squamous cell carcinoma of the esophagus in vivo. *Int J Cancer.* 2008; 122:1639–44.  
<https://doi.org/10.1002/ijc.23288>  
PMID:[18058818](https://pubmed.ncbi.nlm.nih.gov/18058818/)
73. Busso N, Karababa M, Nobile M, Rolaz A, Van Gool F, Galli M, Leo O, So A, De Smedt T. Pharmacological inhibition of nicotinamide phosphoribosyltransferase/visfatin enzymatic activity identifies a new inflammatory pathway linked to NAD. *PLoS One.* 2008; 3:e2267.  
<https://doi.org/10.1371/journal.pone.0002267>  
PMID:[18493620](https://pubmed.ncbi.nlm.nih.gov/18493620/)
74. Sun L, Chen S, Gao H, Ren L, Song G. Visfatin induces the apoptosis of endothelial progenitor cells via the induction of pro-inflammatory mediators through the NF-κB pathway. *Int J Mol Med.* 2017; 40:637–46.  
<https://doi.org/10.3892/ijmm.2017.3048>  
PMID:[28677720](https://pubmed.ncbi.nlm.nih.gov/28677720/)



75. Vallejo S, Romacho T, Angulo J, Villalobos LA, Cercas E, Leivas A, Bermejo E, Carraro R, Sánchez-Ferrer CF, Peiró C. Visfatin impairs endothelium-dependent relaxation in rat and human mesenteric microvessels through nicotinamide phosphoribosyltransferase activity. *PLoS One*. 2011; 6:e27299. <https://doi.org/10.1371/journal.pone.0027299> PMID:22073309
76. Romacho T, Valencia I, Ramos-González M, Vallejo S, López-Esteban M, Lorenzo O, Cannata P, Romero A, San Hipólito-Luengo A, Gómez-Cerezo JF, Peiró C, Sánchez-Ferrer CF. Visfatin/eNamtpt induces endothelial dysfunction in vivo: a role for Toll-Like Receptor 4 and NLRP3 inflammasome. *Sci Rep*. 2020; 10:5386. <https://doi.org/10.1038/s41598-020-62190-w> PMID:32214150
77. Yang WH, Chang AC, Wang SW, Wang SJ, Chang YS, Chang TM, Hsu SK, Fong YC, Tang CH. Leptin promotes VEGF-C production and induces lymphangiogenesis by suppressing miR-27b in human chondrosarcoma cells. *Sci Rep*. 2016; 6:28647. <https://doi.org/10.1038/srep28647> PMID:27345723
78. Tsai HC, Lai YY, Hsu HC, Fong YC, Lien MY, Tang CH. CCL4 Stimulates Cell Migration in Human Osteosarcoma via the mir-3927-3p/Integrin  $\alpha\beta 3$  Axis. *Int J Mol Sci*. 2021; 22:12737. <https://doi.org/10.3390/ijms222312737> PMID:34884541
79. Achudhan D, Liu SC, Lin YY, Lee HP, Wang SW, Huang WC, Wu YC, Kuo YH, Tang CH. Antcin K inhibits VEGF-dependent angiogenesis in human rheumatoid arthritis synovial fibroblasts. *J Food Biochem*. 2022; 46:e14022. <https://doi.org/10.1111/jfbc.14022> PMID:34841538
80. Lee HP, Liu SC, Wang YH, Chen BC, Chen HT, Li TM, Huang WC, Hsu CJ, Wu YC, Tang CH. Cordycerebroside A suppresses VCAM-dependent monocyte adhesion in osteoarthritis synovial fibroblasts by inhibiting MEK/ERK/AP-1 signaling. *J Funct Foods*. 2021; 86:104712. <https://doi.org/10.1016/j.jff.2021.104712>
81. Lee KT, Su CH, Liu SC, Chen BC, Chang JW, Tsai CH, Huang WC, Hsu CJ, Chen WC, Wu YC, Tang CH. Cordycerebroside A inhibits ICAM-1-dependent M1 monocyte adhesion to osteoarthritis synovial fibroblasts. *J Food Biochem*. 2022; 46:e14108. <https://doi.org/10.1111/jfbc.14108> PMID:35165902
82. Wu TJ, Chang SL, Lin CY, Lai CY, He XY, Tsai CH, Ko CY, Fong YC, Su CM, Tang CH. IL-17 Facilitates VCAM-1 Production and Monocyte Adhesion in Osteoarthritis Synovial Fibroblasts by Suppressing miR-5701 Synthesis. *Int J Mol Sci*. 2022; 23:6804. <https://doi.org/10.3390/ijms23126804> PMID:35743247
83. Chen PC, Liu JF, Fong YC, Huang YL, Chao CC, Tang CH. CCN3 Facilitates Runx2 and Osterix Expression by Inhibiting miR-608 through PI3K/Akt Signaling in Osteoblasts. *Int J Mol Sci*. 2019; 20:3300. <https://doi.org/10.3390/ijms20133300> PMID:31284378
84. Chang WS, Tsai CW, Yang JS, Hsu YM, Shih LC, Chiu HY, Bau DT, Tsai FJ. Resveratrol inhibited the metastatic behaviors of cisplatin-resistant human oral cancer cells via phosphorylation of ERK/p-38 and suppression of MMP-2/9. *J Food Biochem*. 2021; 45:e13666. <https://doi.org/10.1111/jfbc.13666> PMID:34008860
85. Su CH, Lin CY, Tsai CH, Lee HP, Lo LC, Huang WC, Wu YC, Hsieh CL, Tang CH. Betulin suppresses TNF- $\alpha$  and IL-1 $\beta$  production in osteoarthritis synovial fibroblasts by inhibiting the MEK/ERK/NF- $\kappa$ B pathway. *J Funct Foods*. 2021; 86:104729. <https://doi.org/10.1016/j.jff.2021.104729>
86. Lu CC, Tsai HC, Yang DY, Wang SW, Tsai MH, Hua CH, Chen KJ, Chen MY, Lien MY, Tang CH. The Chemokine CCL4 Stimulates Angiopoietin-2 Expression and Angiogenesis via the MEK/ERK/STAT3 Pathway in Oral Squamous Cell Carcinoma. *Biomedicines*. 2022; 10:1612. <https://doi.org/10.3390/biomedicines10071612> PMID:35884919
87. Lin YY, Chang SL, Liu SC, Achudhan D, Tsai YS, Lin SW, Chen YL, Chen CC, Chang JW, Fong YC, Hu SL, Tang CH. Therapeutic Effects of Live *Lactobacillus plantarum* GKD7 in a Rat Model of Knee Osteoarthritis. *Nutrients*. 2022; 14:1612. <https://doi.org/10.3390/nu14153170> PMID:35956346
88. Chang SL, Lin YY, Liu SC, Tsai YS, Lin SW, Chen YL, Chen CC, Ko CY, Chen HT, Chen WC, Tang CH. Oral Administration of *Clostridium butyricum* GKB7 Ameliorates Signs of Osteoarthritis in Rats. *Cells*. 2022; 11:2169. <https://doi.org/10.3390/cells11142169> PMID:35883610
89. Yang SY, Fang CJ, Chen YW, Chen WP, Lee LY, Chen CC, Lin YY, Liu SC, Tsai CH, Huang WC, Wu YC, Tang CH. *Hericium erinaceus* Mycelium Ameliorates In Vivo Progression of Osteoarthritis. *Nutrients*. 2022; 14:2605. <https://doi.org/10.3390/nu14132605> PMID:35807786

SUPPLEMENTARY MATERIALS

Supplementary Figures

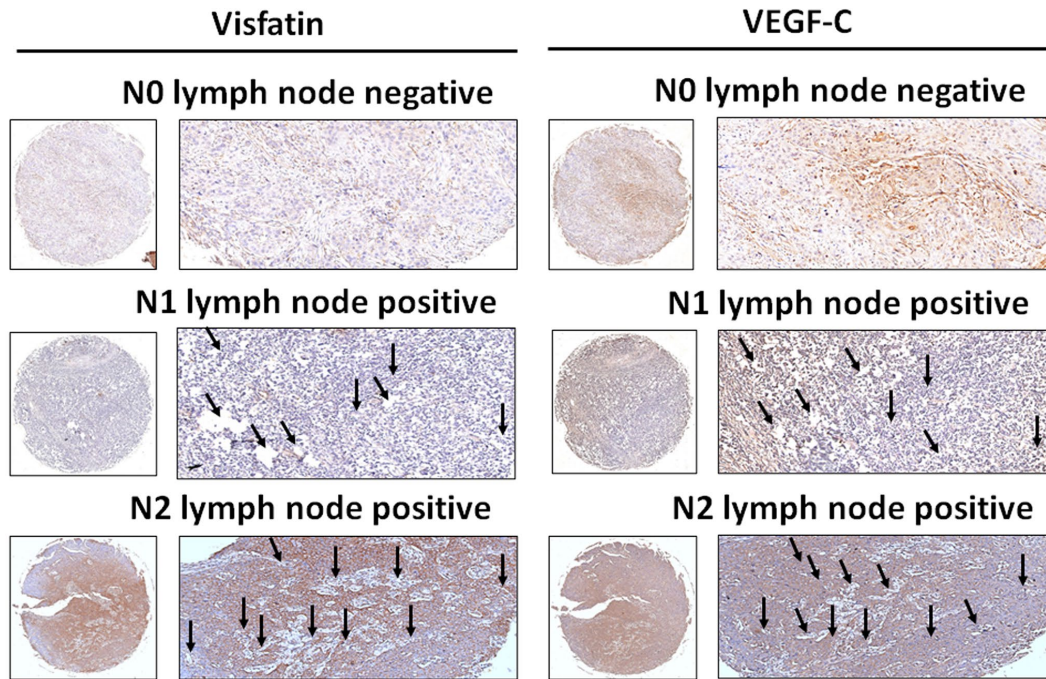

**Supplementary Figure 1. Lymphatic vessel density levels are upregulated in ESCC tumor tissues.** Histologic sections of ESCC tumor stained with immunoassayed with visfatin or VEGF-C antibody. The black arrows indicate positive peritumoral lymphatic vessels identified in the ESCC tumor tissues.

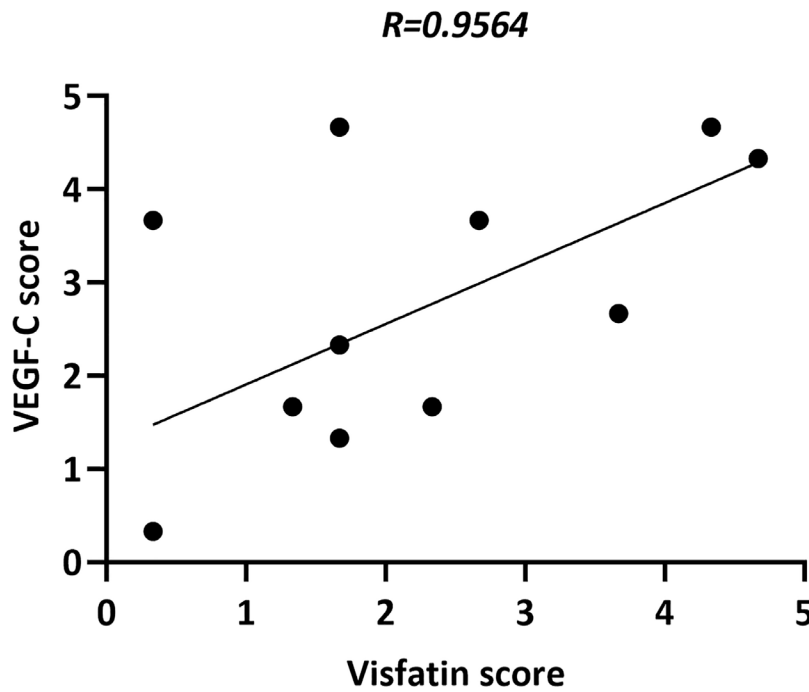

**Supplementary Figure 2. A positive correlation was identified between levels of visfatin and VEGF-C expression on ESCC tumor tissues.** Histologic sections of ESCC tumor stained with visfatin or VEGF-C antibody and positive association between visfatin and VEGF-C was analyzed.

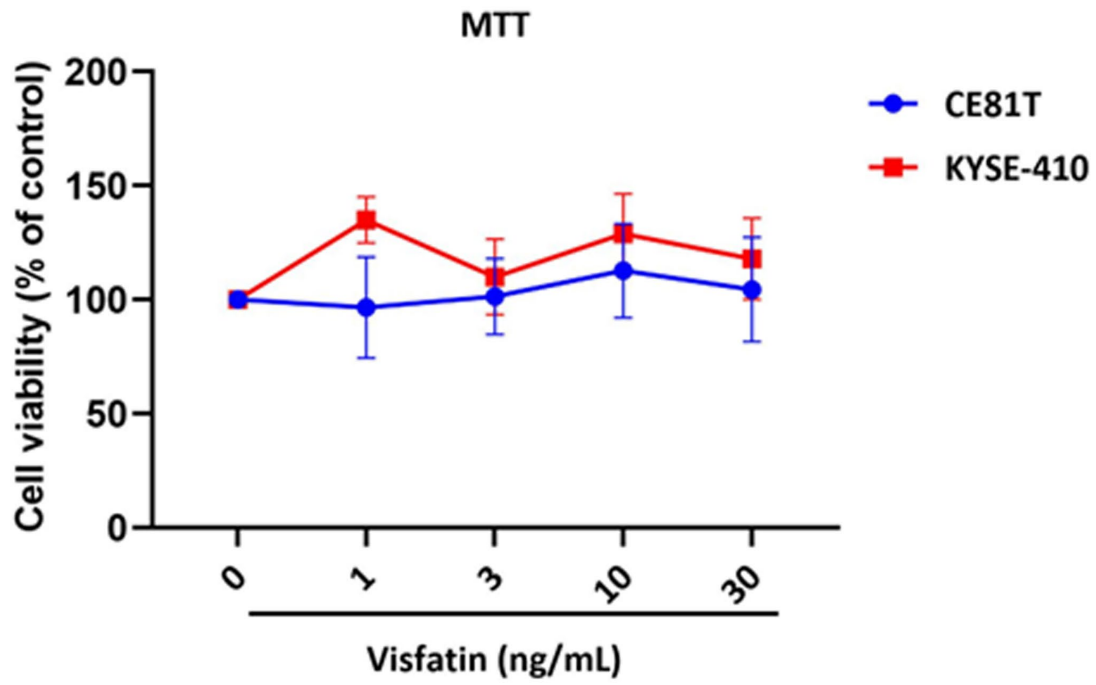

**Supplementary Figure 3. Visfatin K does not affect ESCC cell viability.** ESCCs were incubated with different concentrations of visfatin K (0, 1, 3, 10, or 30 ng/mL) for 24 h and cell viability was examined by the MTT assay.

## Supplementary Tables

**Supplementary Table 1. Inhibitors used in this study.**

| Inhibitors | Name     | Source                                    | Catalog No. | Concentration |
|------------|----------|-------------------------------------------|-------------|---------------|
| MEK        | PD98059  | Sigma (St. Louis, MO, USA)                | P215-1MG    | 10 $\mu$ M    |
| ERK        | FR180204 | Santa Cruz Biotechnology, Dallas, TX, USA | SC-203945   | 10 $\mu$ M    |
| $\kappa$ B | PDTC     | Sigma (St. Louis, MO, USA)                | P8765-1G    | 3 $\mu$ M     |
| $\kappa$ B | TPCK     | Sigma (St. Louis, MO, USA)                | T4376-100MG | 3 $\mu$ M     |

**Supplementary Table 2. siRNA used in this study.**

| Gene    | Species | Source                                       | Catalog no       |
|---------|---------|----------------------------------------------|------------------|
| MEK     | Human   | Dharmacon (2650 Crescent Dr, Lafayette, USA) | L00357100        |
| ERK     | Human   | Dharmacon (2650 Crescent Dr, Lafayette, USA) | L00355500        |
| p65     | Human   | Dharmacon (2650 Crescent Dr, Lafayette, USA) | L-003533-00-0005 |
| Control | Human   | Dharmacon (2650 Crescent Dr, Lafayette, USA) | D-001810-10-05   |

**Supplementary Table 3. Primers used in this study.**

| Gene          | Forward              | Reverse              |
|---------------|----------------------|----------------------|
| <i>VEGF-C</i> | CACTTGCTGGGCTTCTTCT  | CACAGACCGTAACTGCTCCT |
| <i>GAPD-H</i> | AATGGACAACTGGTCGTGGA | CCCTCCAGGGATCTGTTTG  |

**Supplementary Table 4. Antibodies used in this study.**

| Protein        | Dilution | Catalog No. | Source                                    |
|----------------|----------|-------------|-------------------------------------------|
| VEGF-C         | 1:3000   | SC-9047     | Santa Cruz Biotechnology, Dallas, TX, USA |
| Visfatin       | 1:3000   | ab45890     | Abcam, Shanghai, China                    |
| $\beta$ -actin | 1:3000   | SC-58673    | Santa Cruz Biotechnology, Dallas, TX, USA |
| p-MEK1/2       | 1:3000   | #9121       | Cell Signaling (Danvers, MA, USA)         |
| MEK            | 1:3000   | #9122       | Cell Signaling (Danvers, MA, USA)         |
| p-ERK          | 1:3000   | SC-7383     | Santa Cruz Biotechnology, Dallas, TX, USA |
| ERK            | 1:3000   | SC-1647     | Santa Cruz Biotechnology, Dallas, TX, USA |
| p-p65          | 1:3000   | SC-101752   | Santa Cruz Biotechnology, Dallas, TX, USA |
| p65            | 1:3000   | SC-8008     | Santa Cruz Biotechnology, Dallas, TX, USA |
